# Supplementary figures and images for: Comprehensive analysis of glycoprotein VI-mediated platelet activation signaling pathway for predicting pan-cancer survival and response to anti-PD-1 immunotherapy
Source: PubMed Central journal article supplement — Comput Struct Biotechnol J. 2023 Apr 15;21:2873–83. doi: 10.1016/j.csbj.2023.04.002 (PMC10189353; doi:10.1016/j.csbj.2023.04.002), 2023-04-15

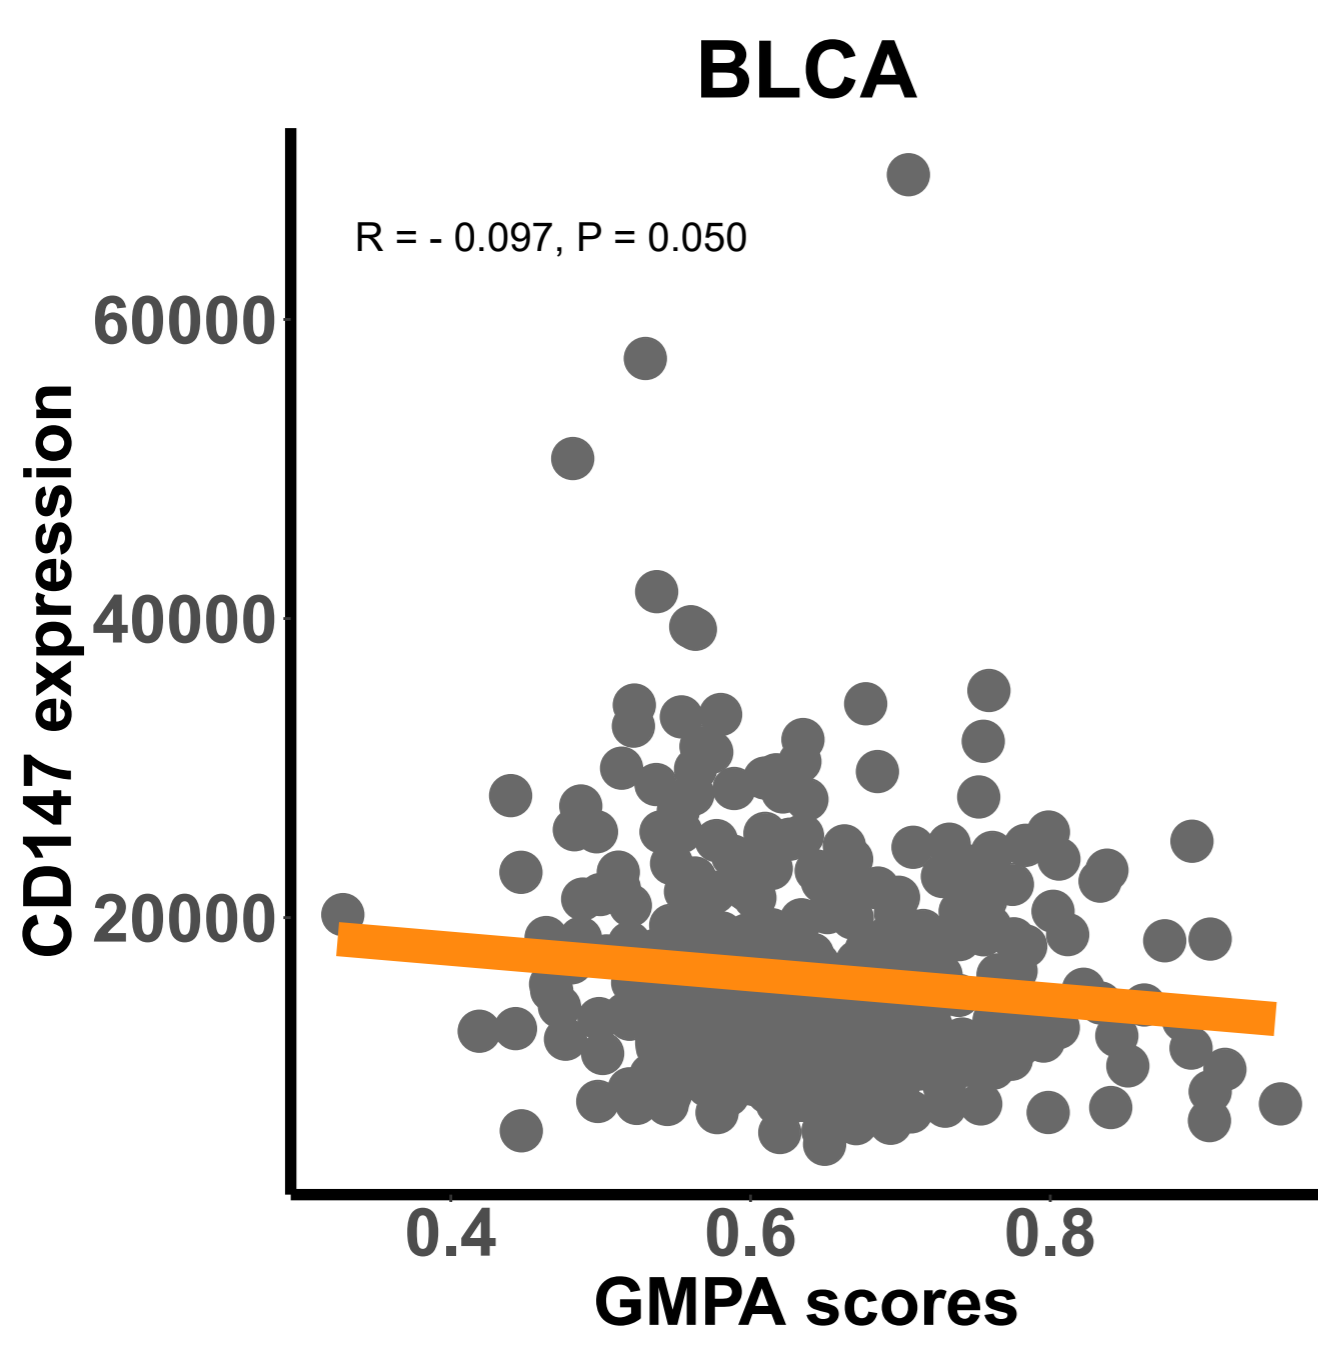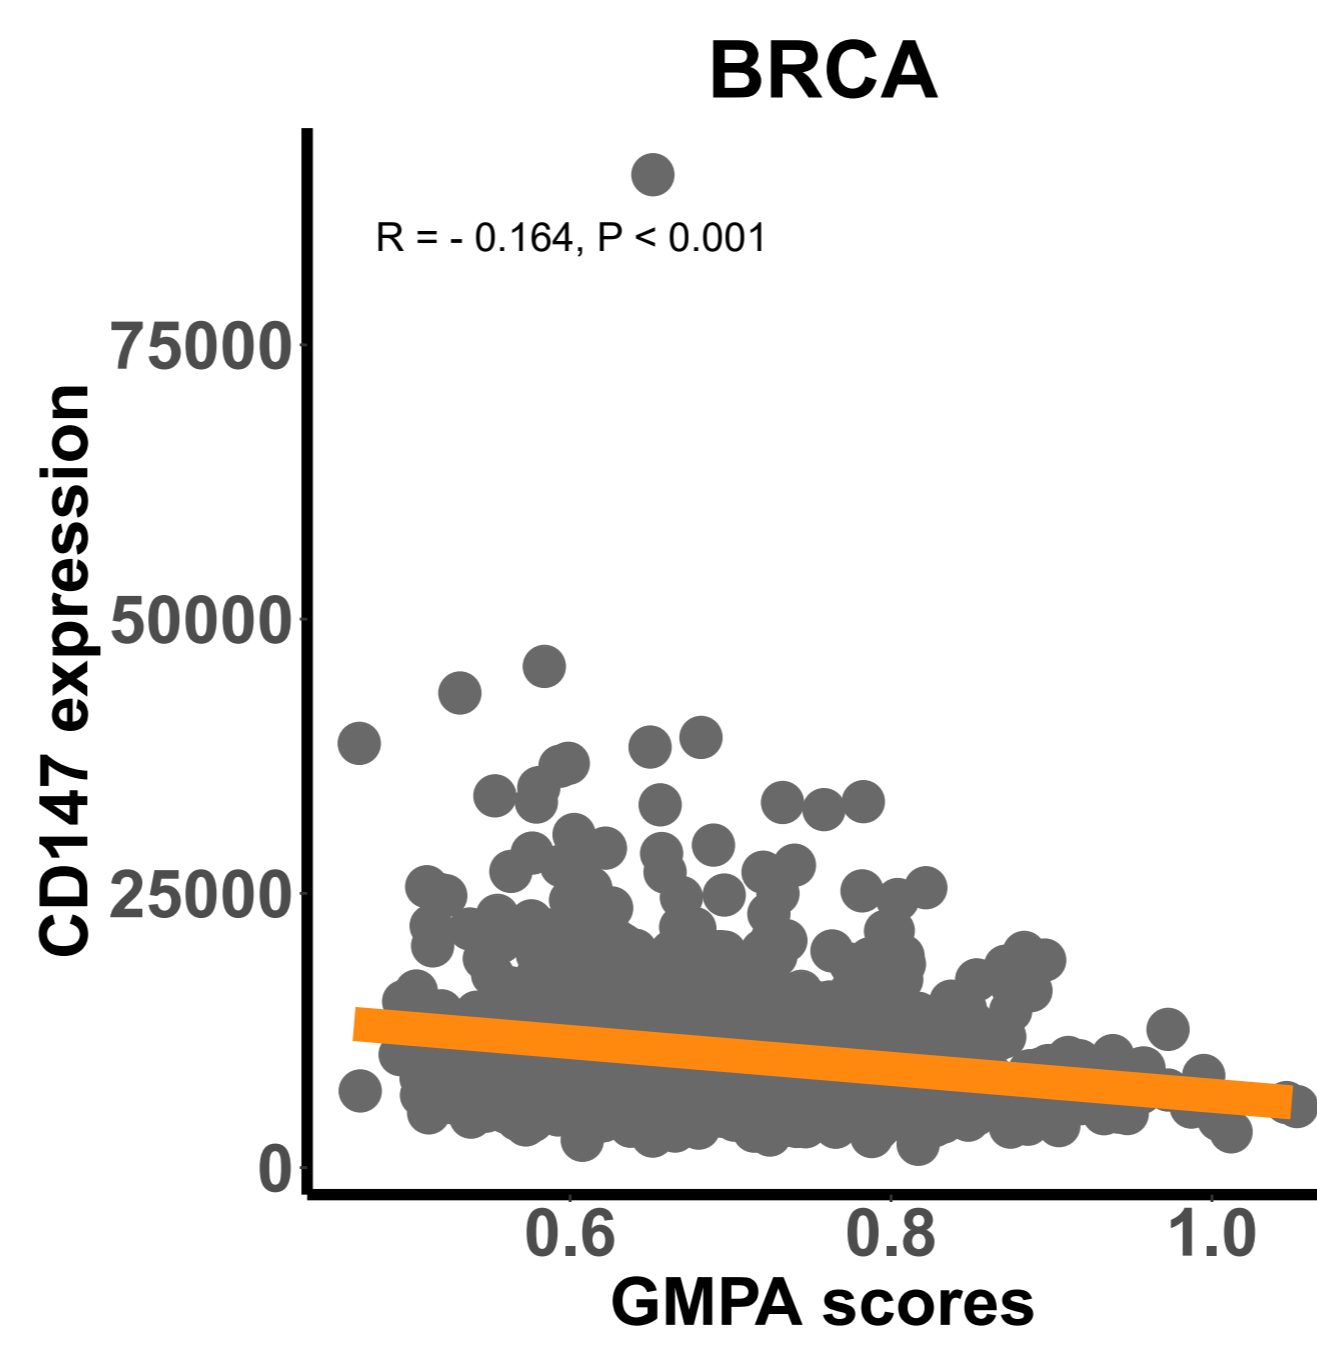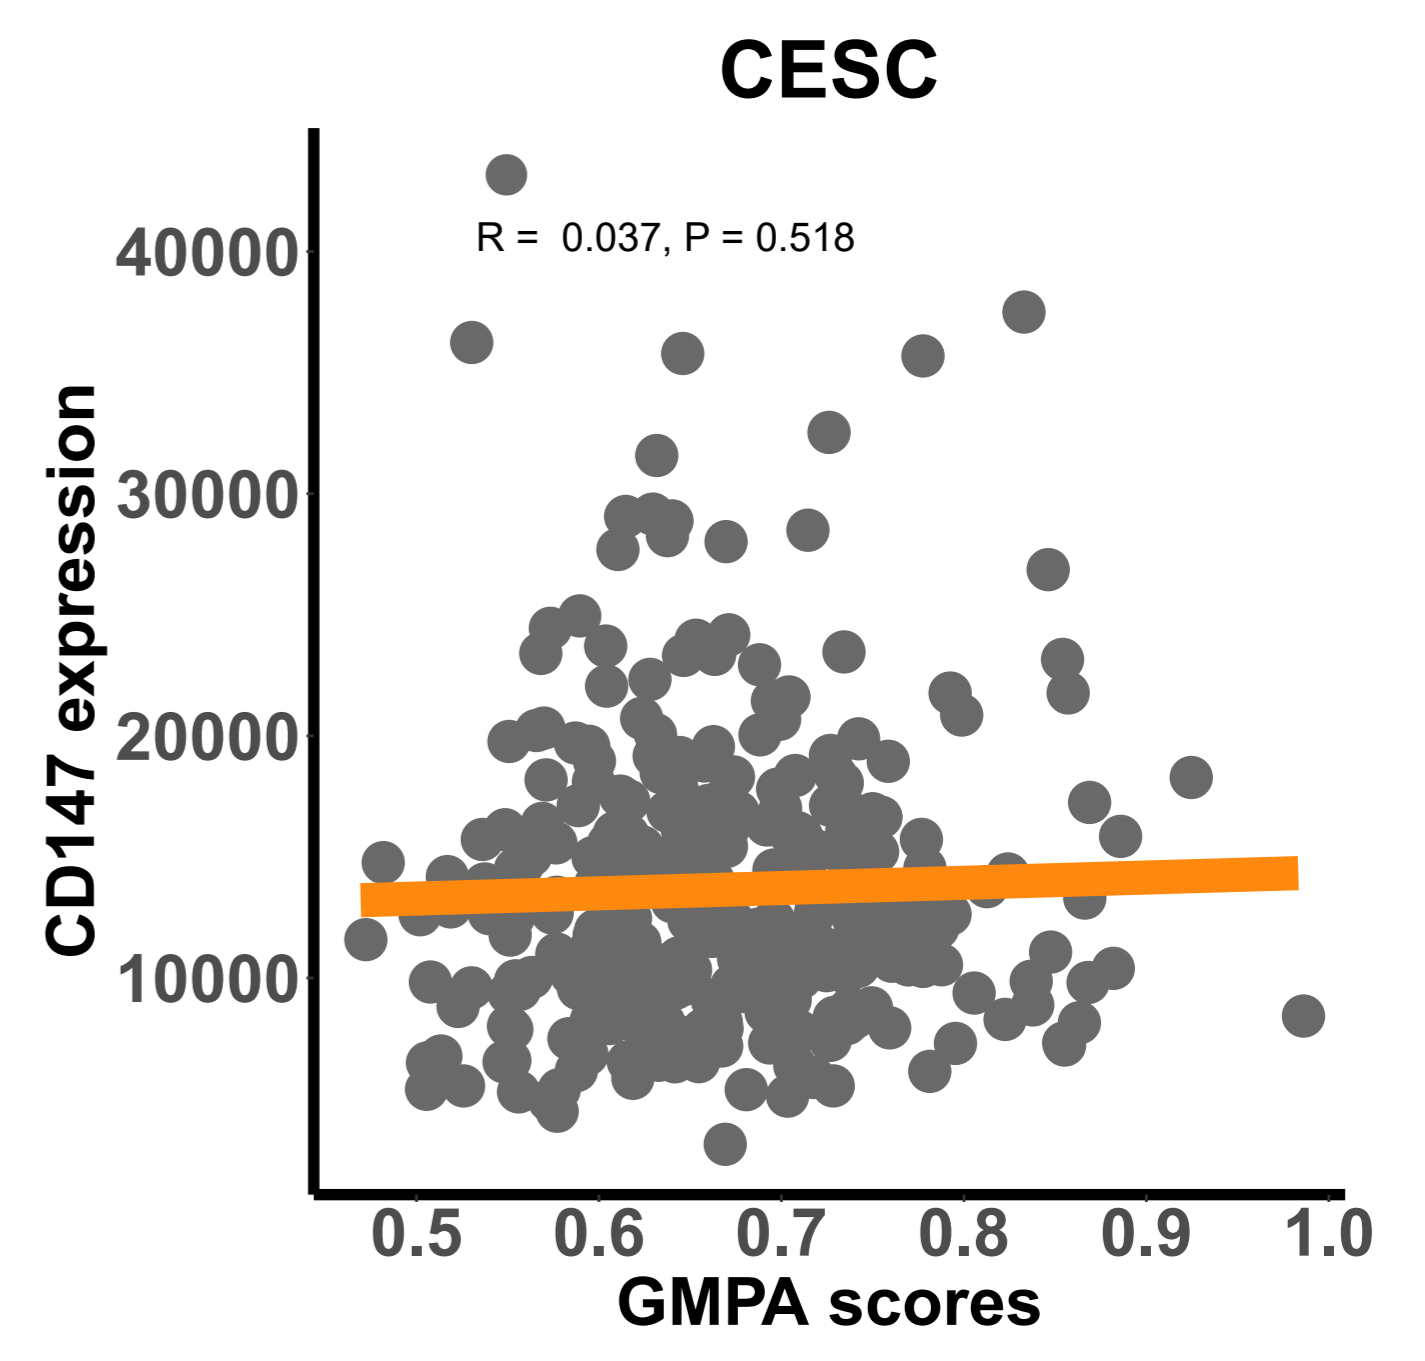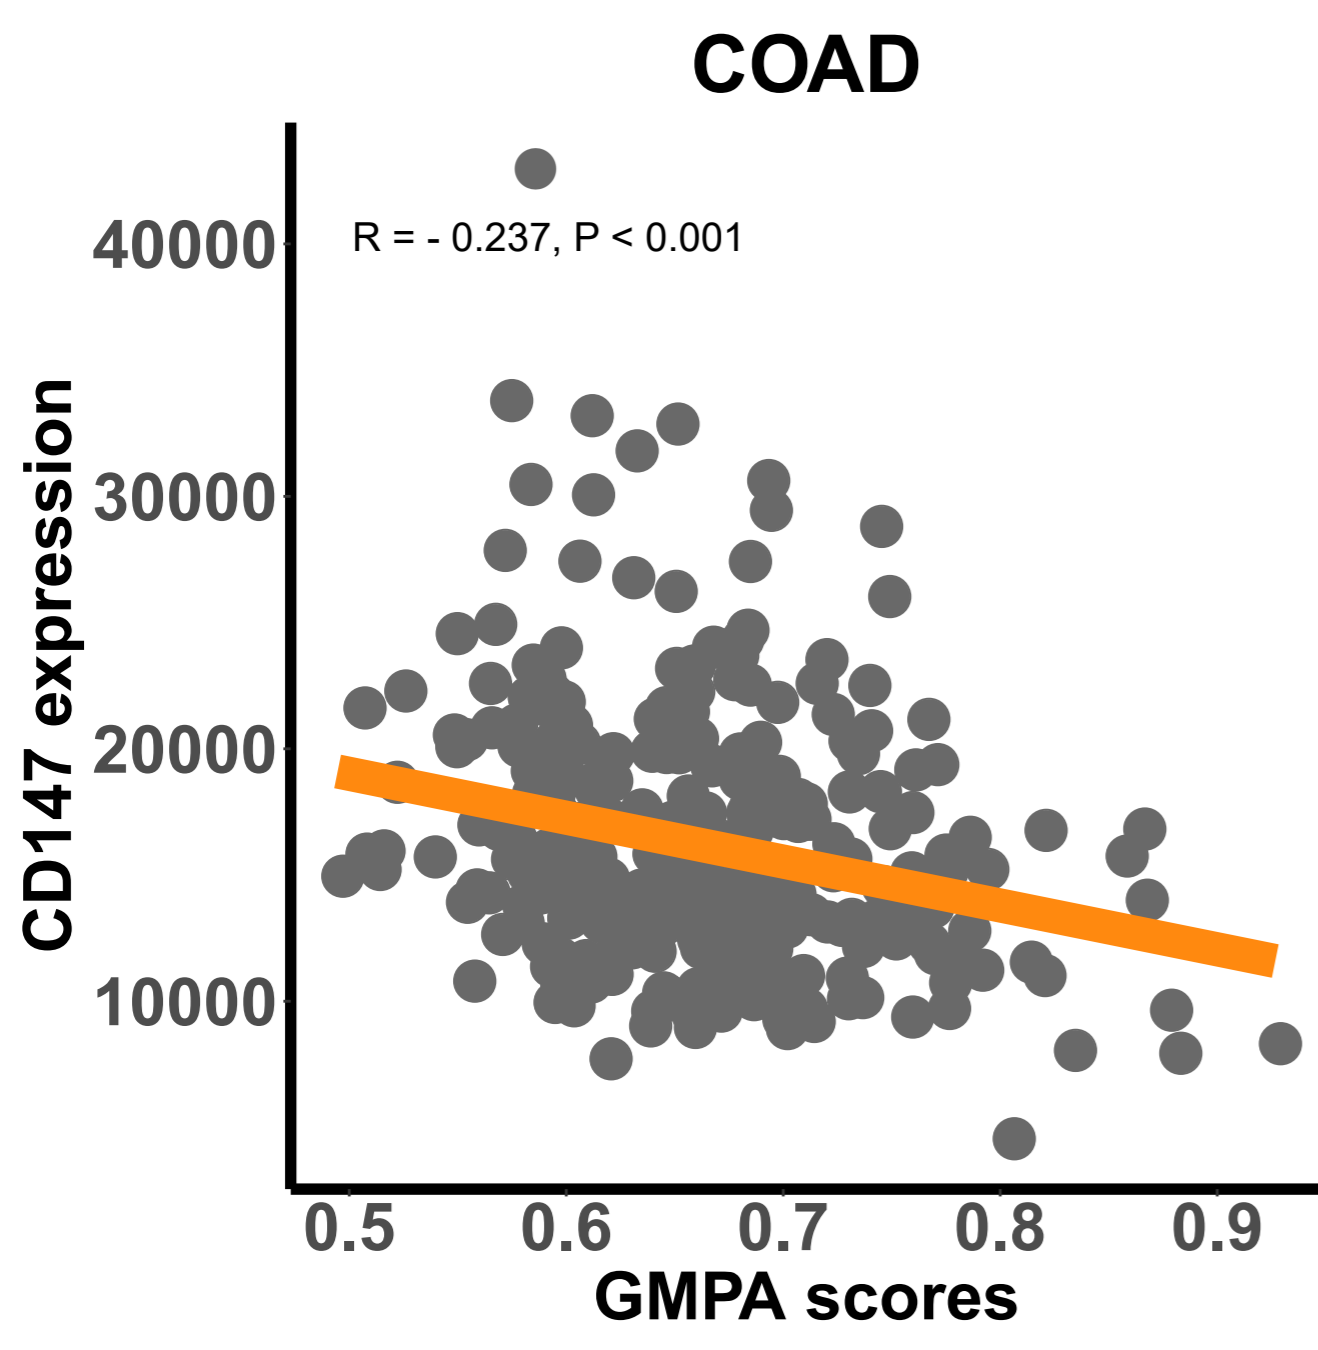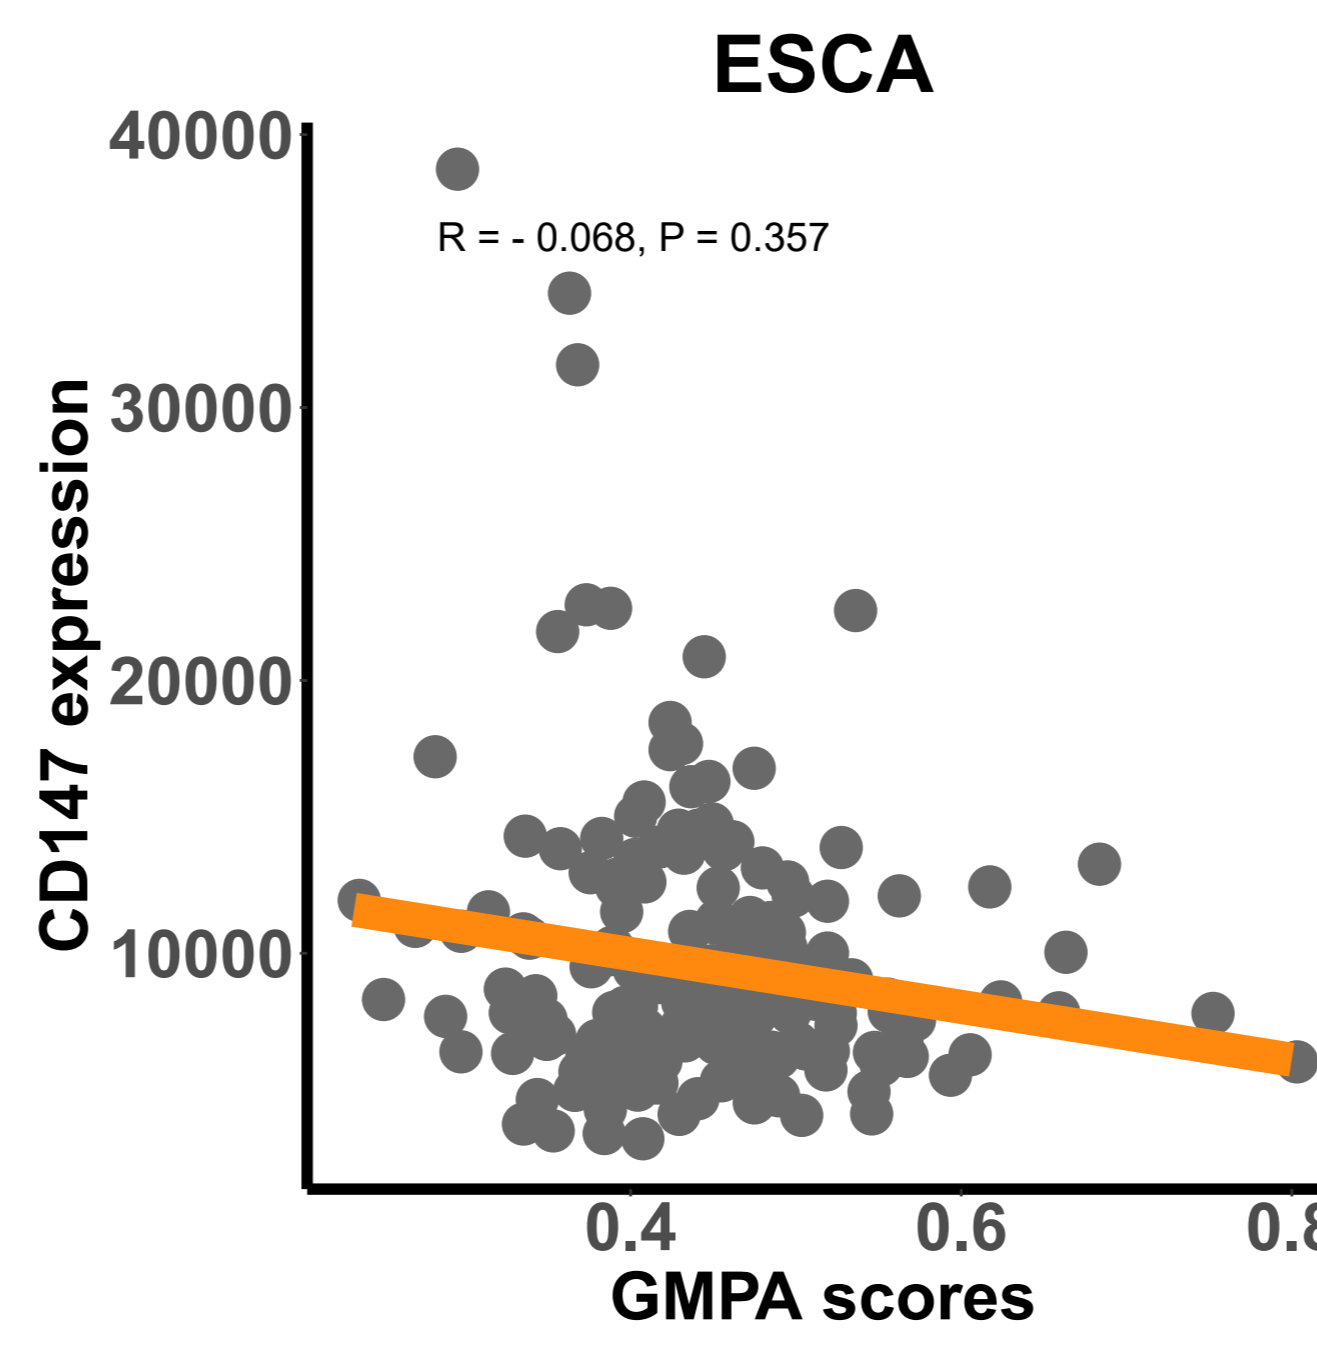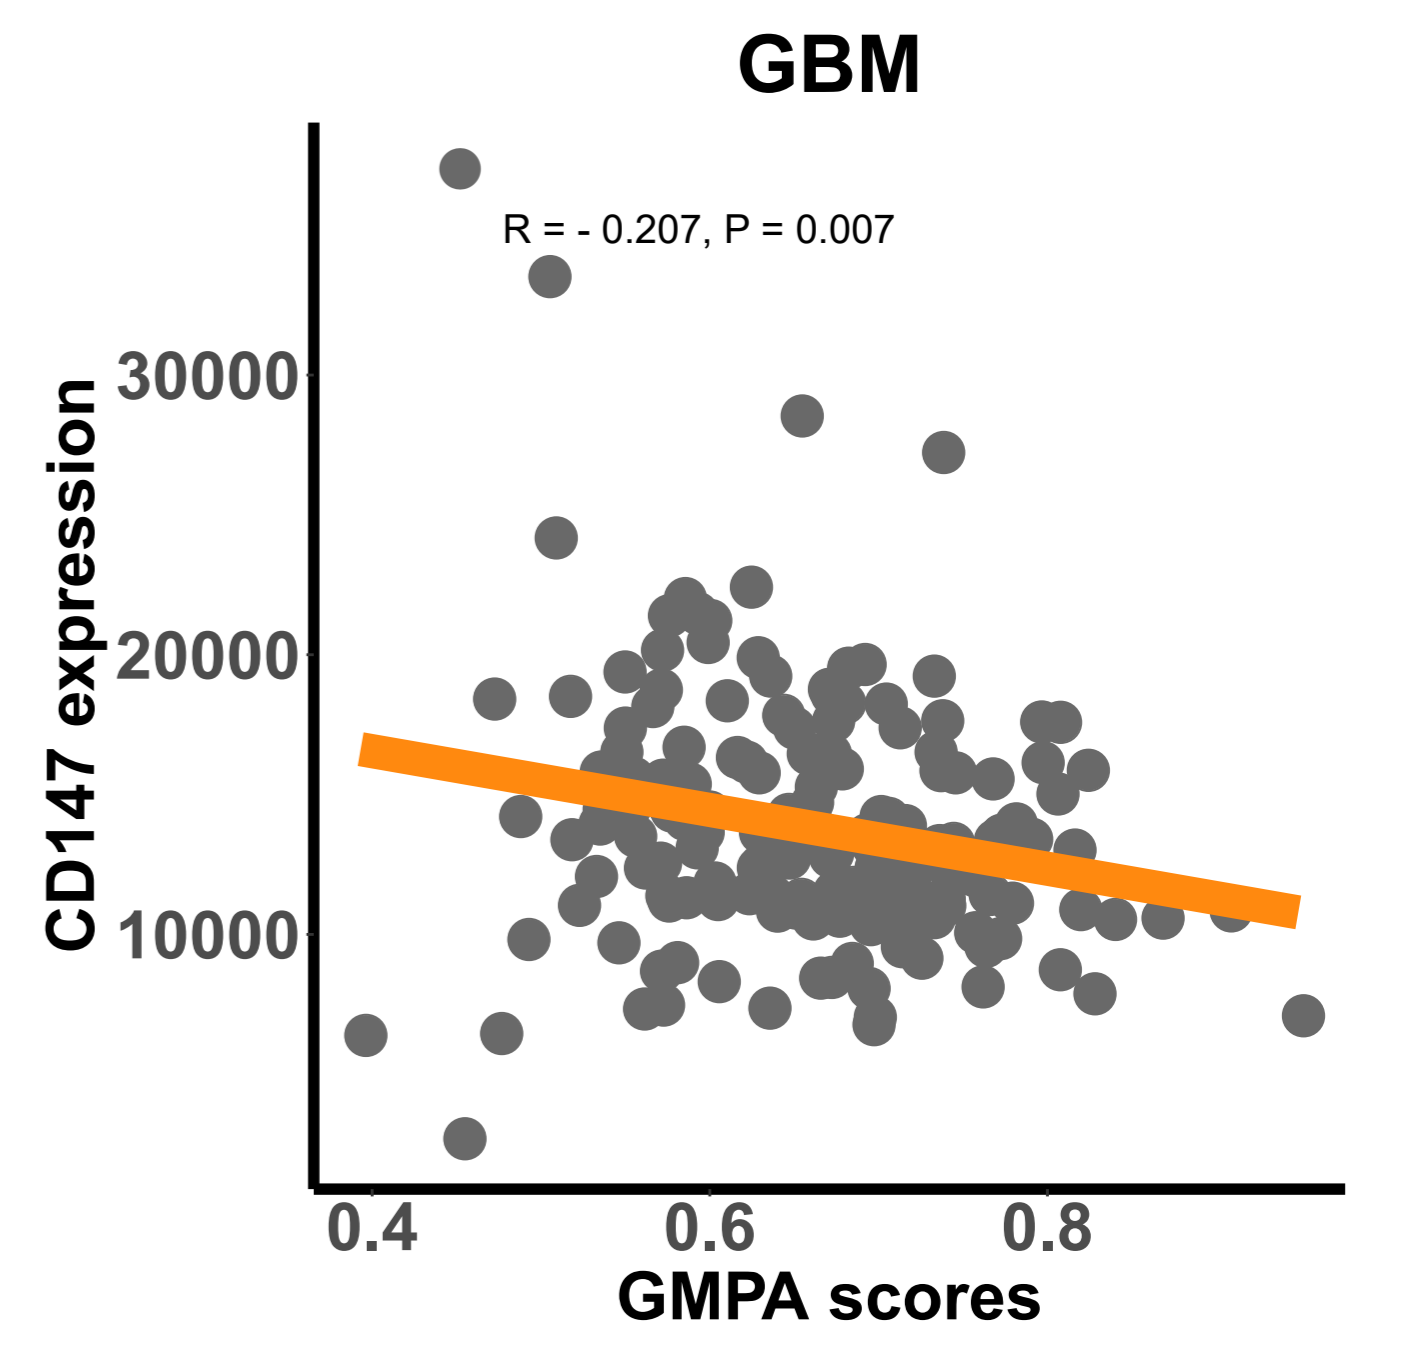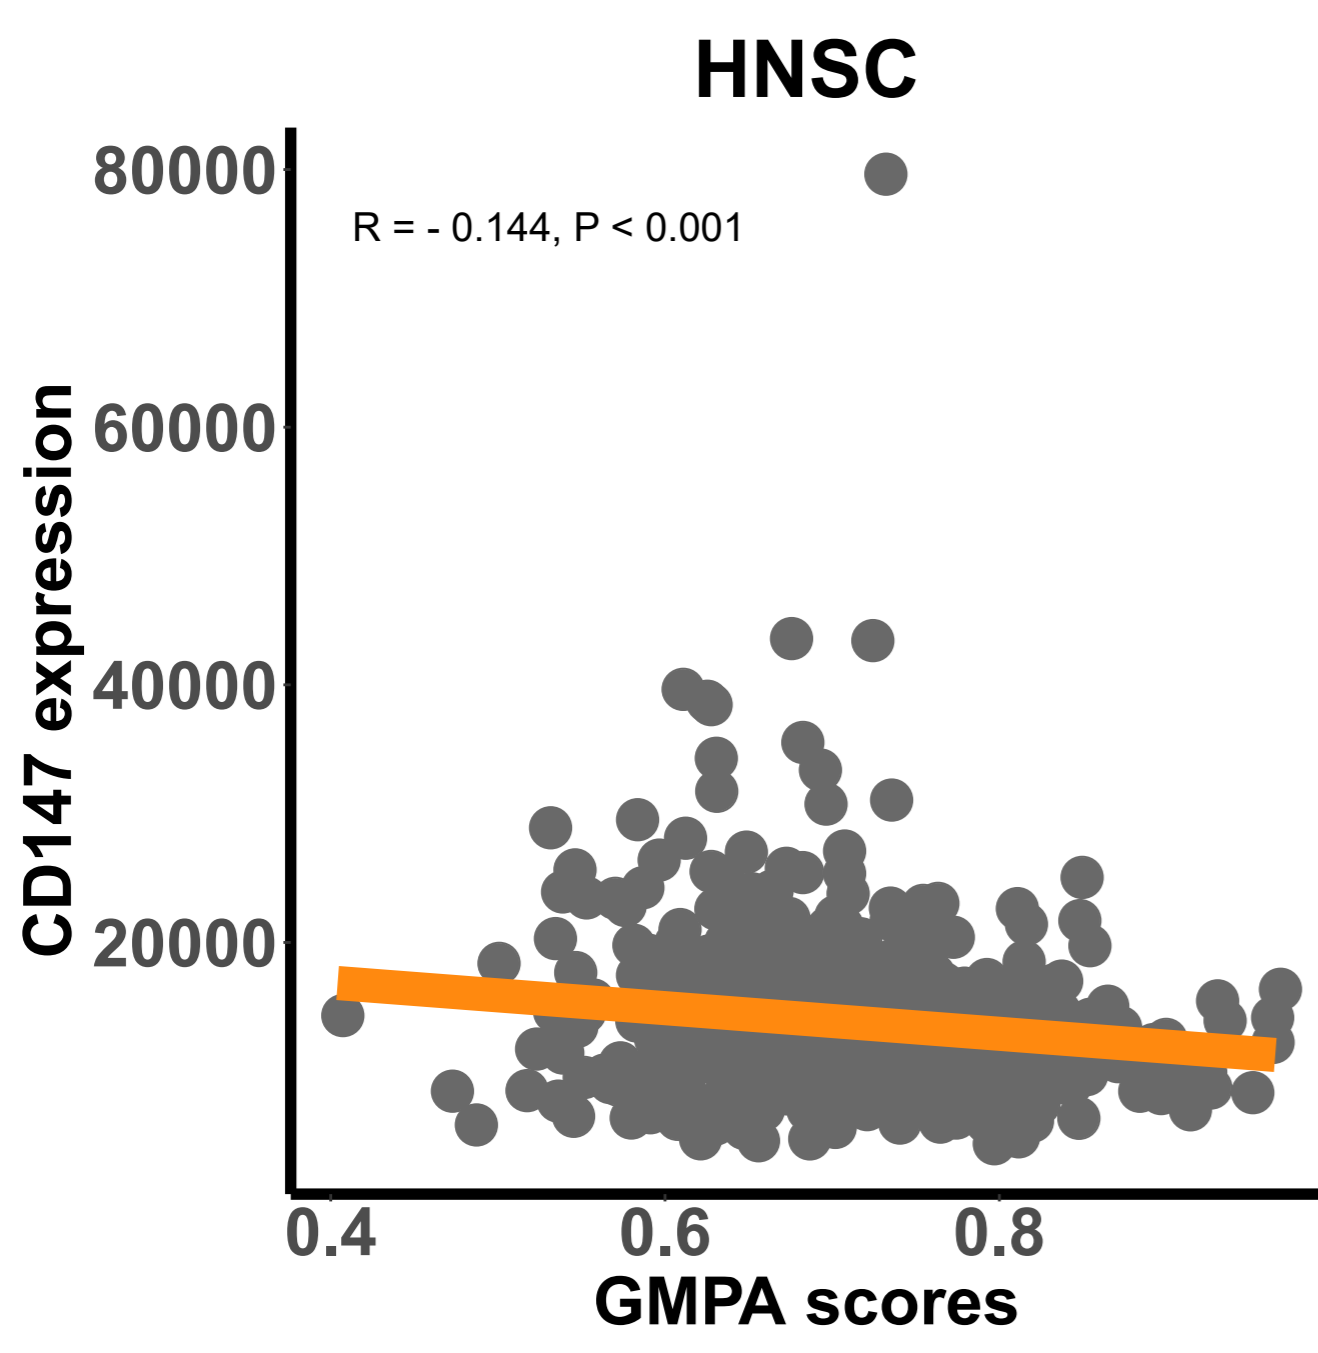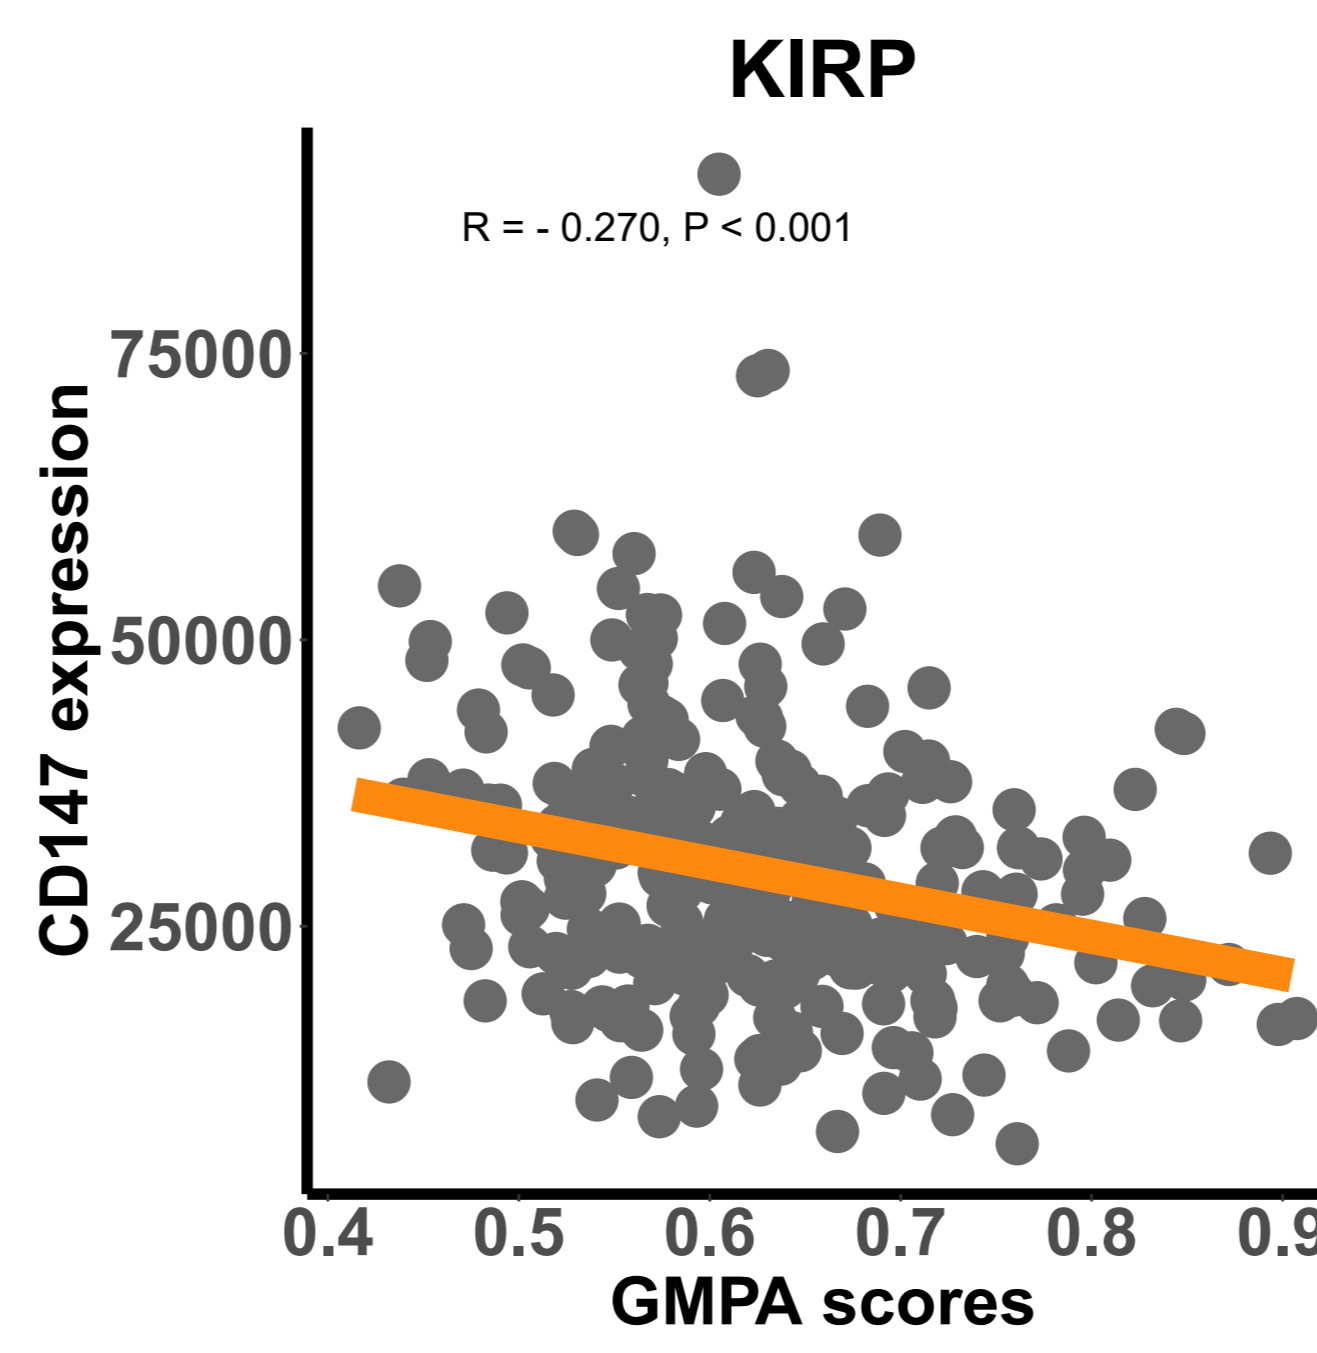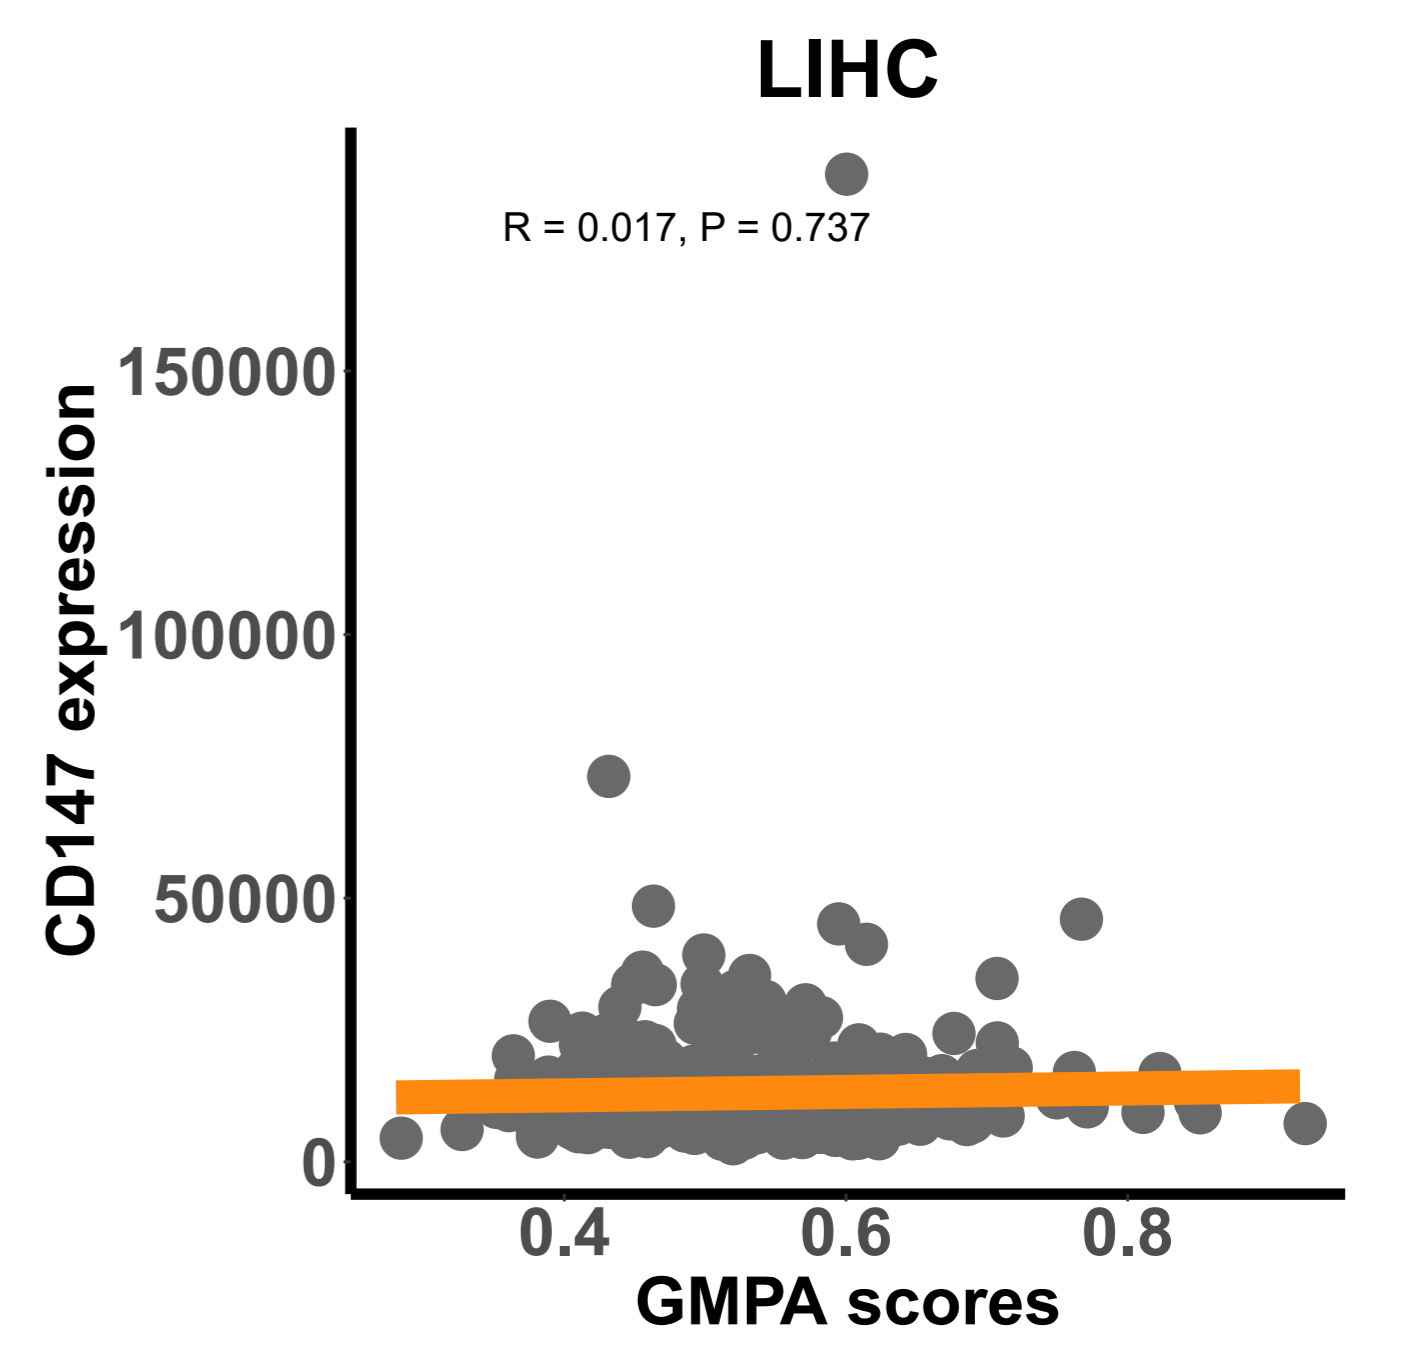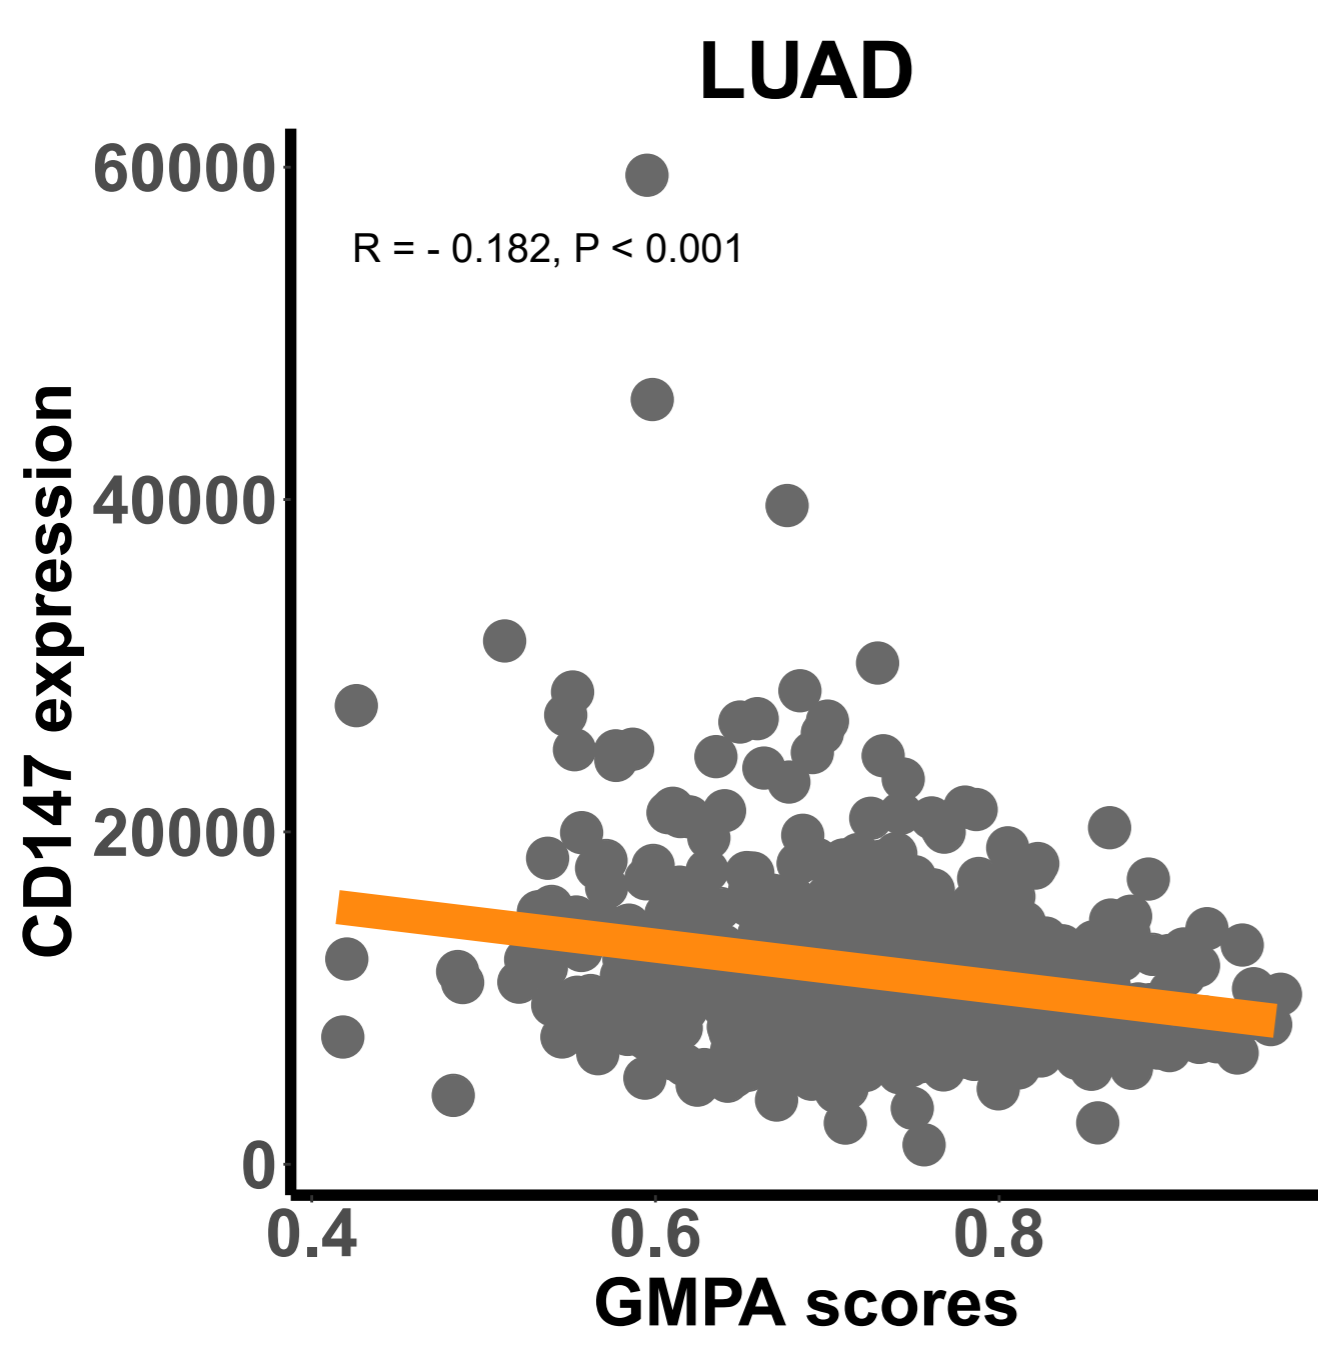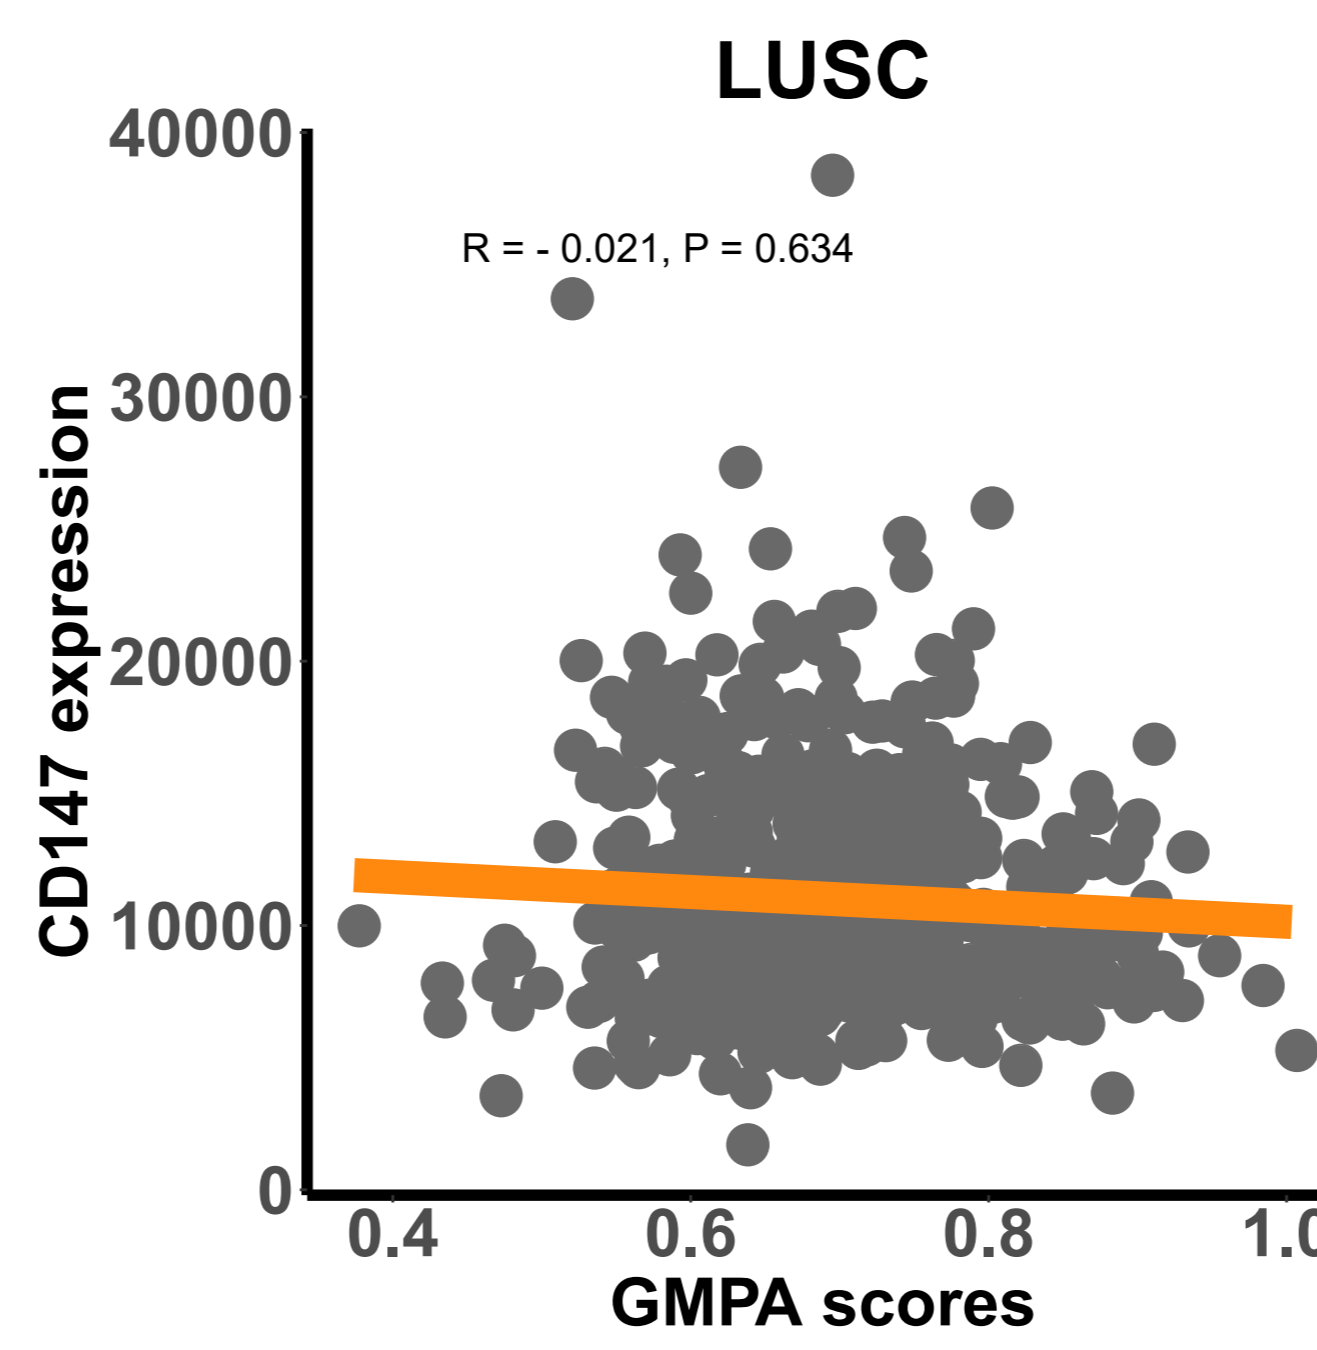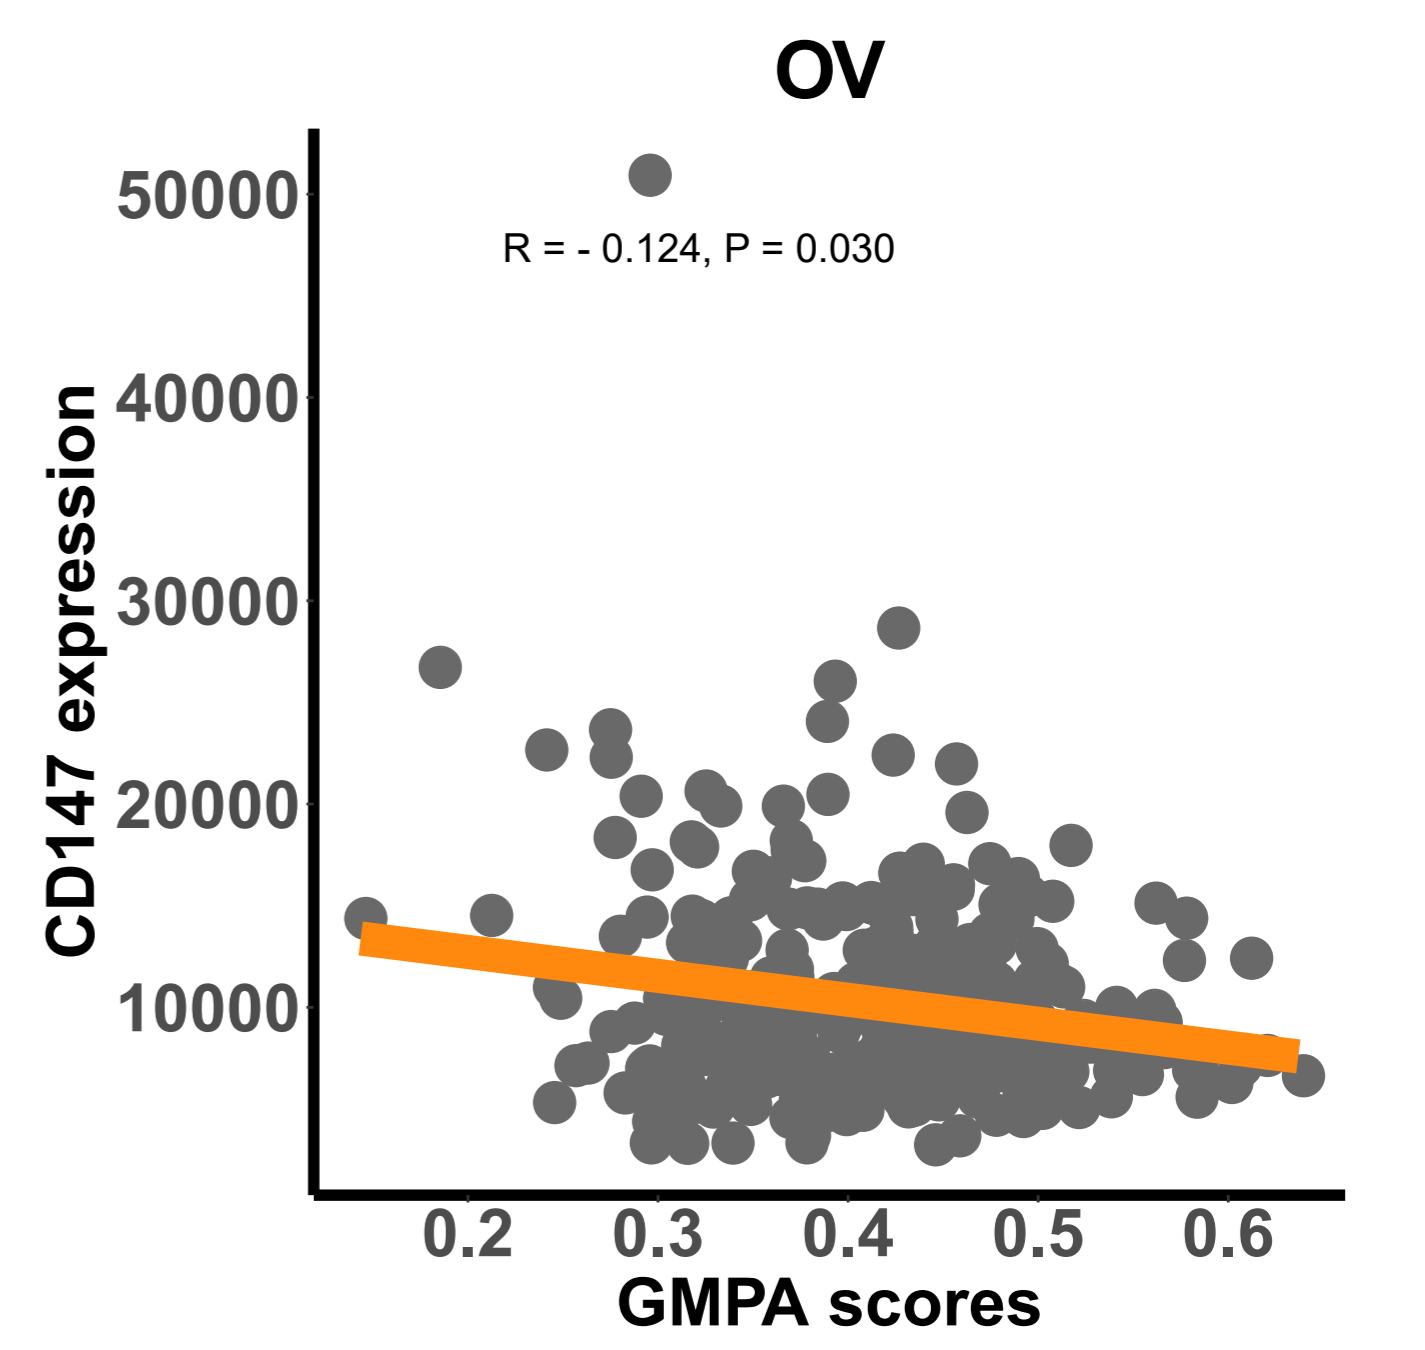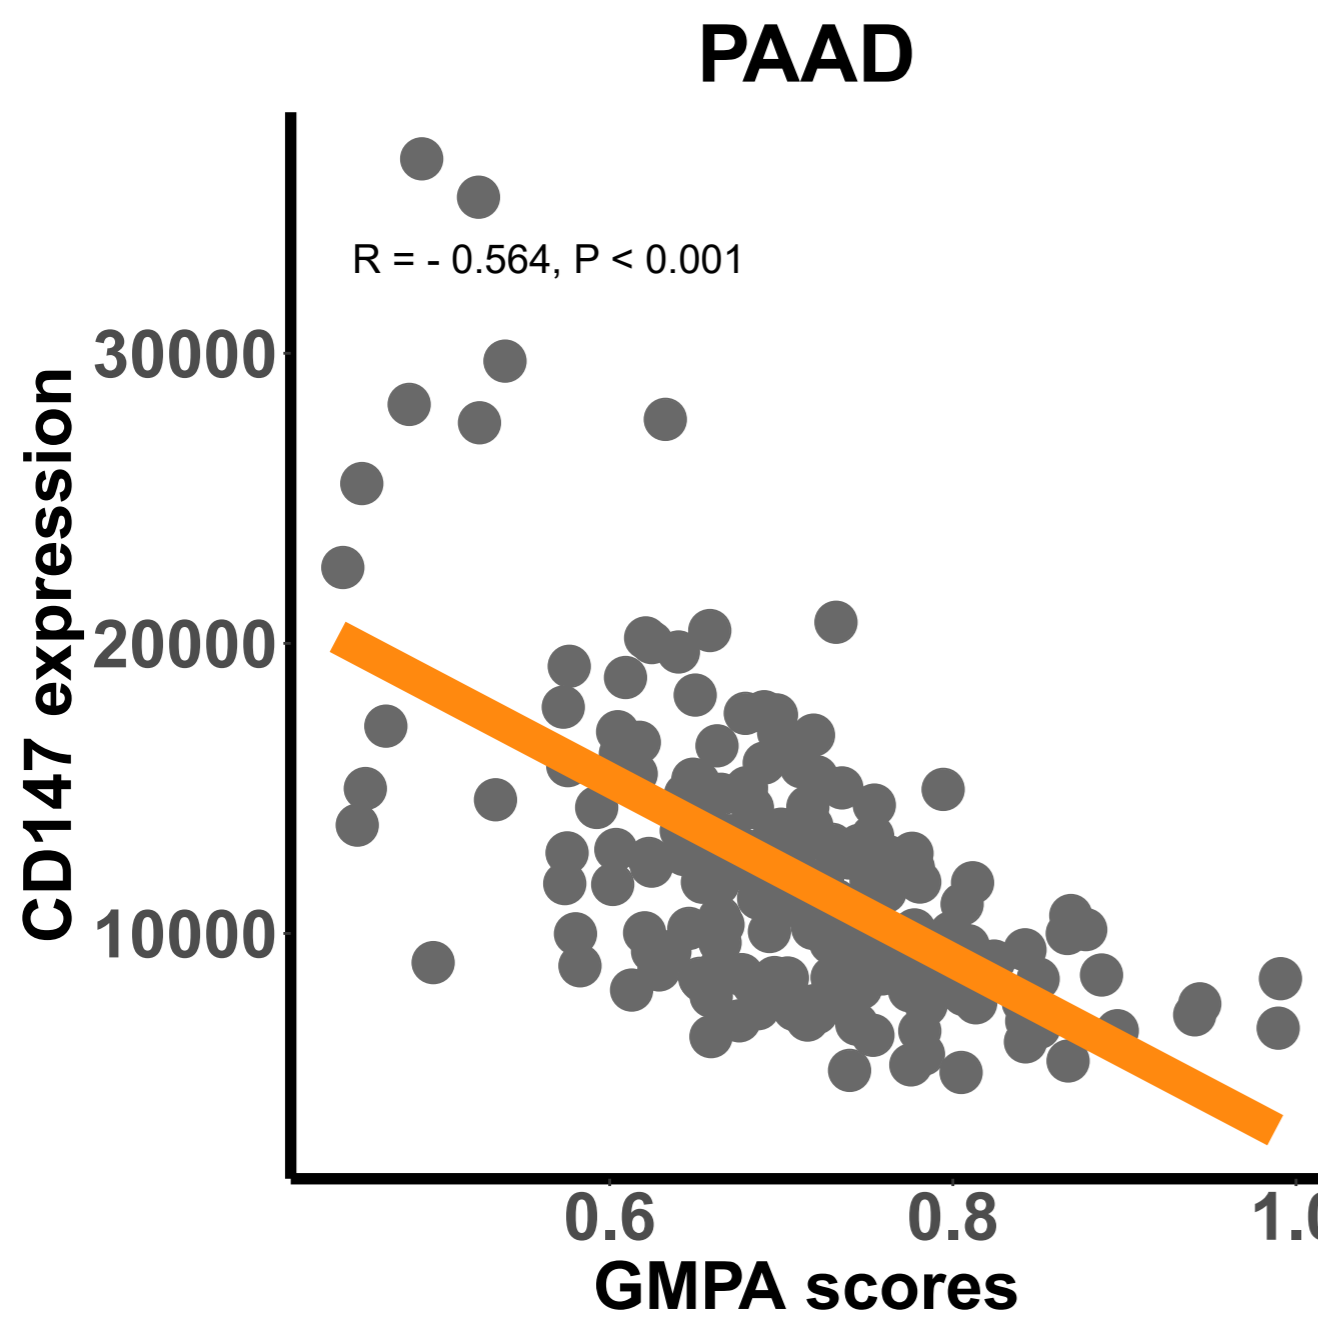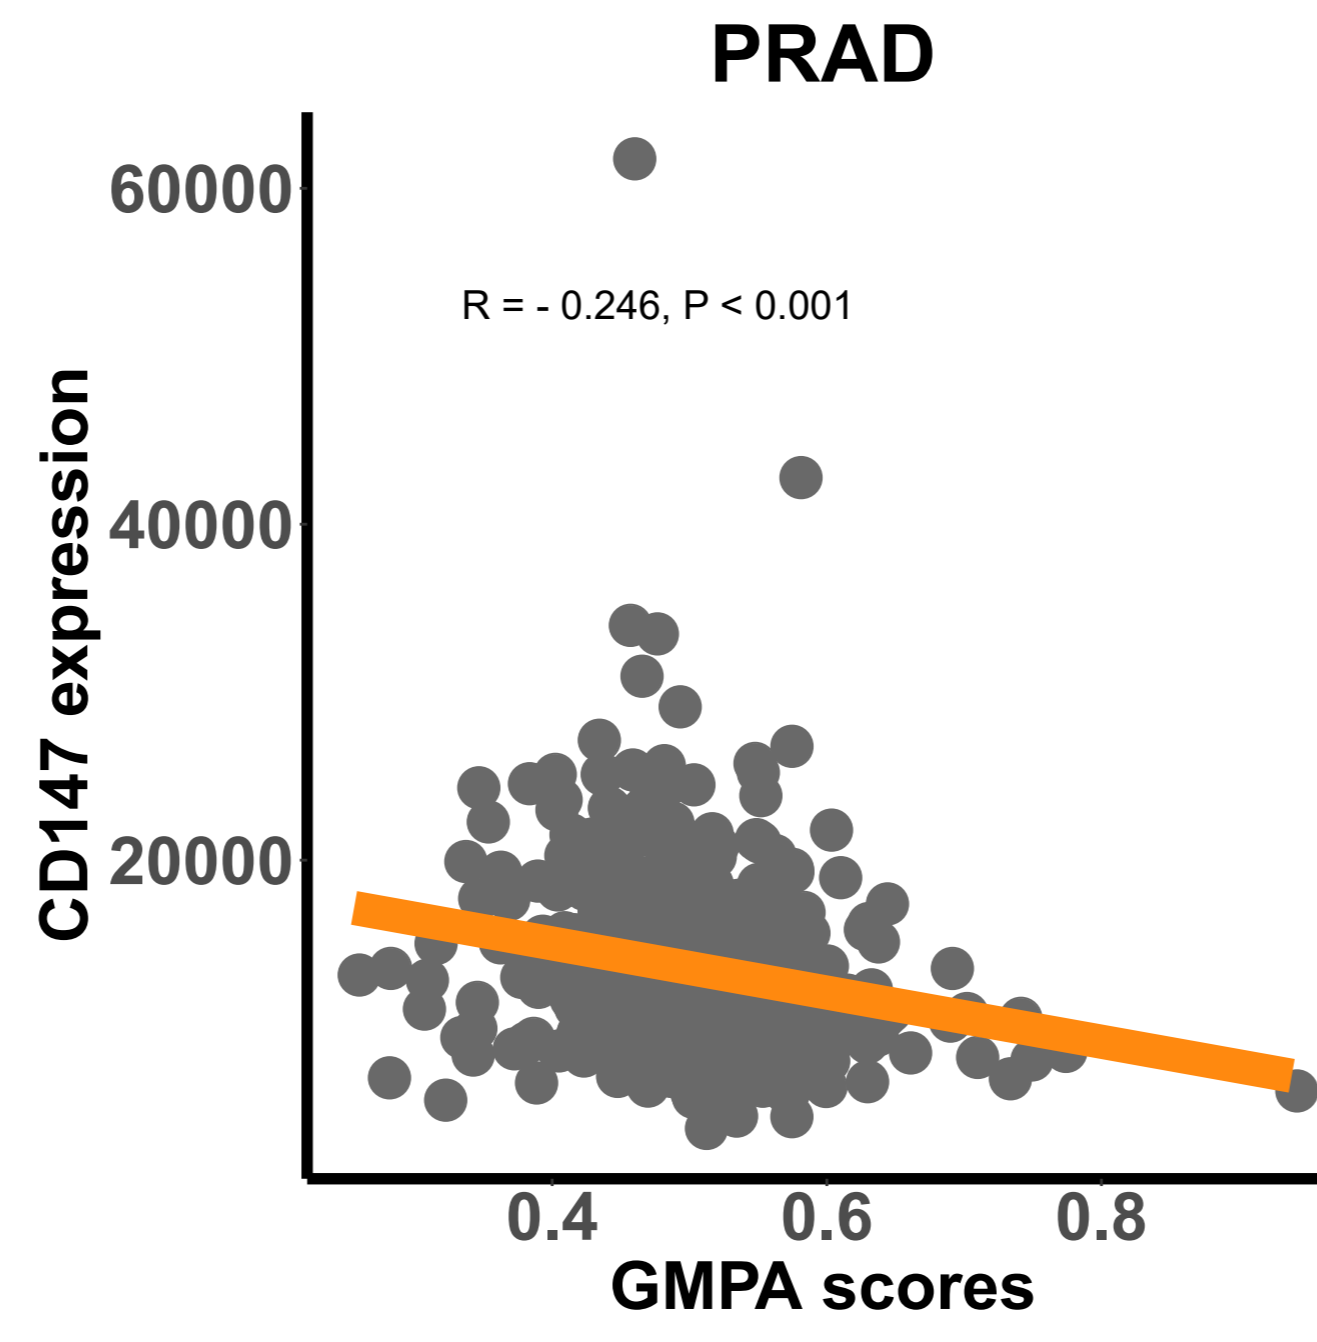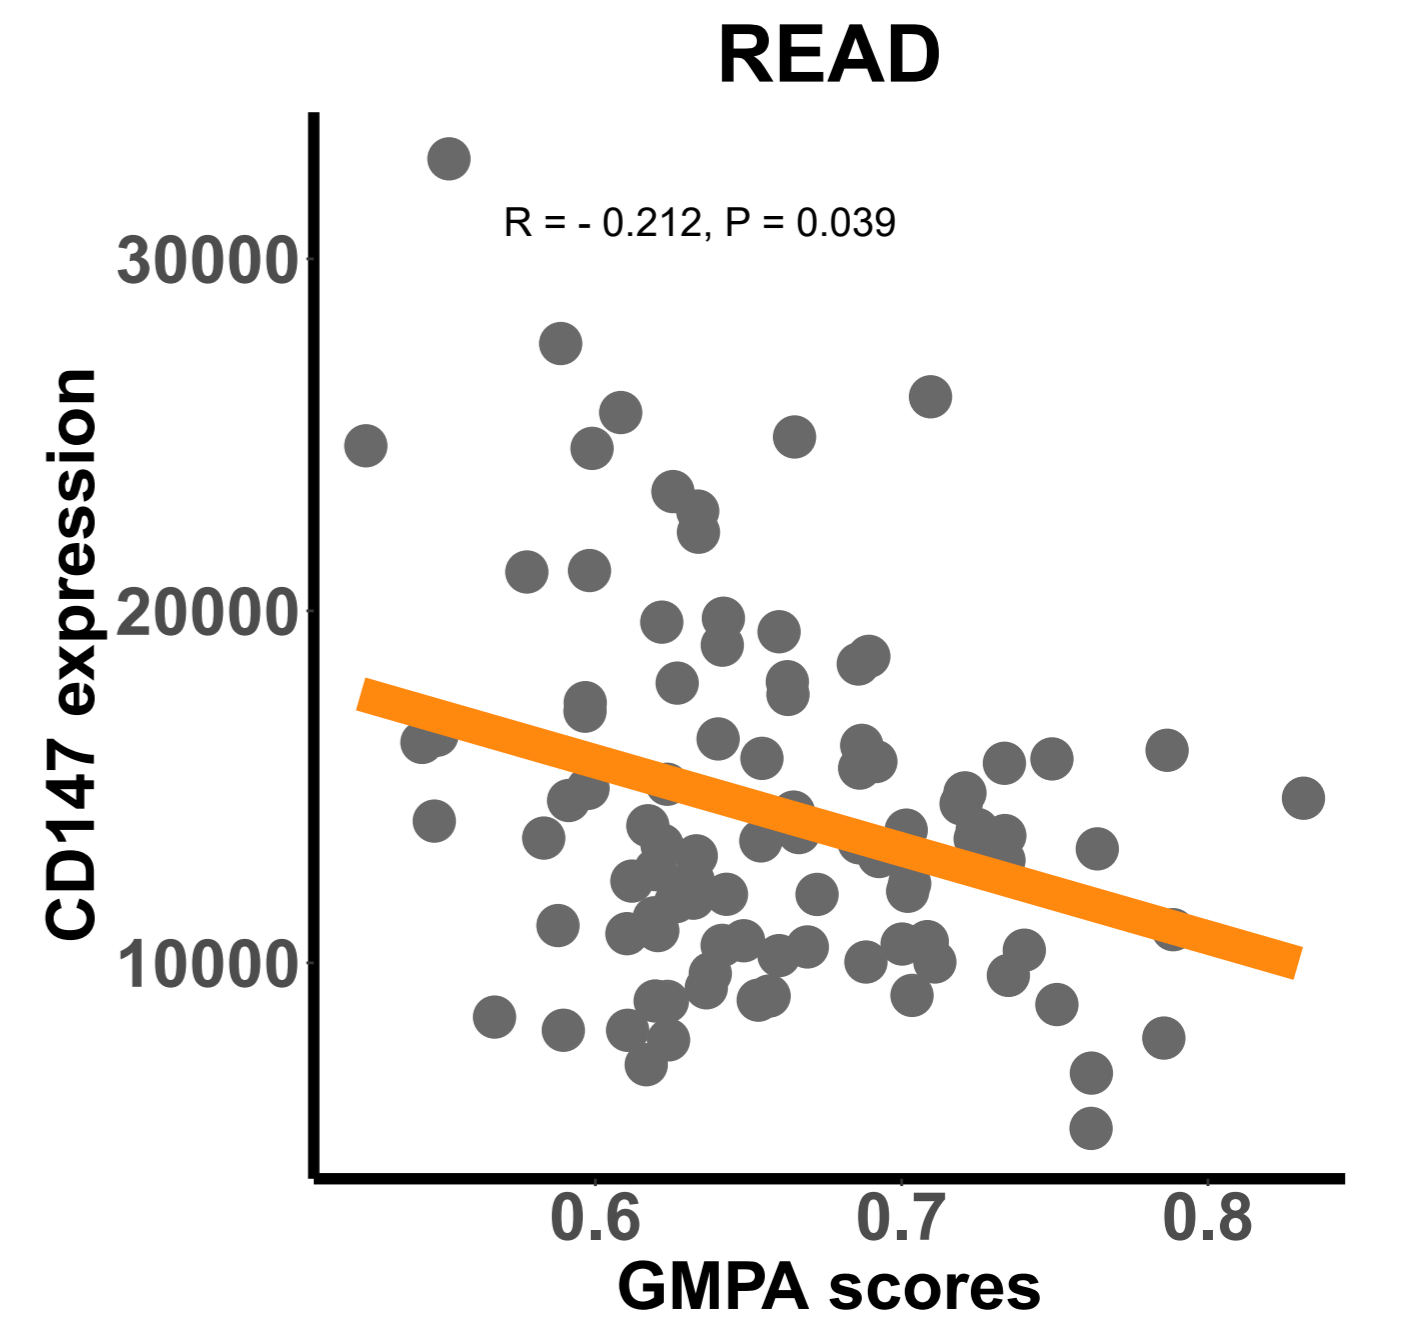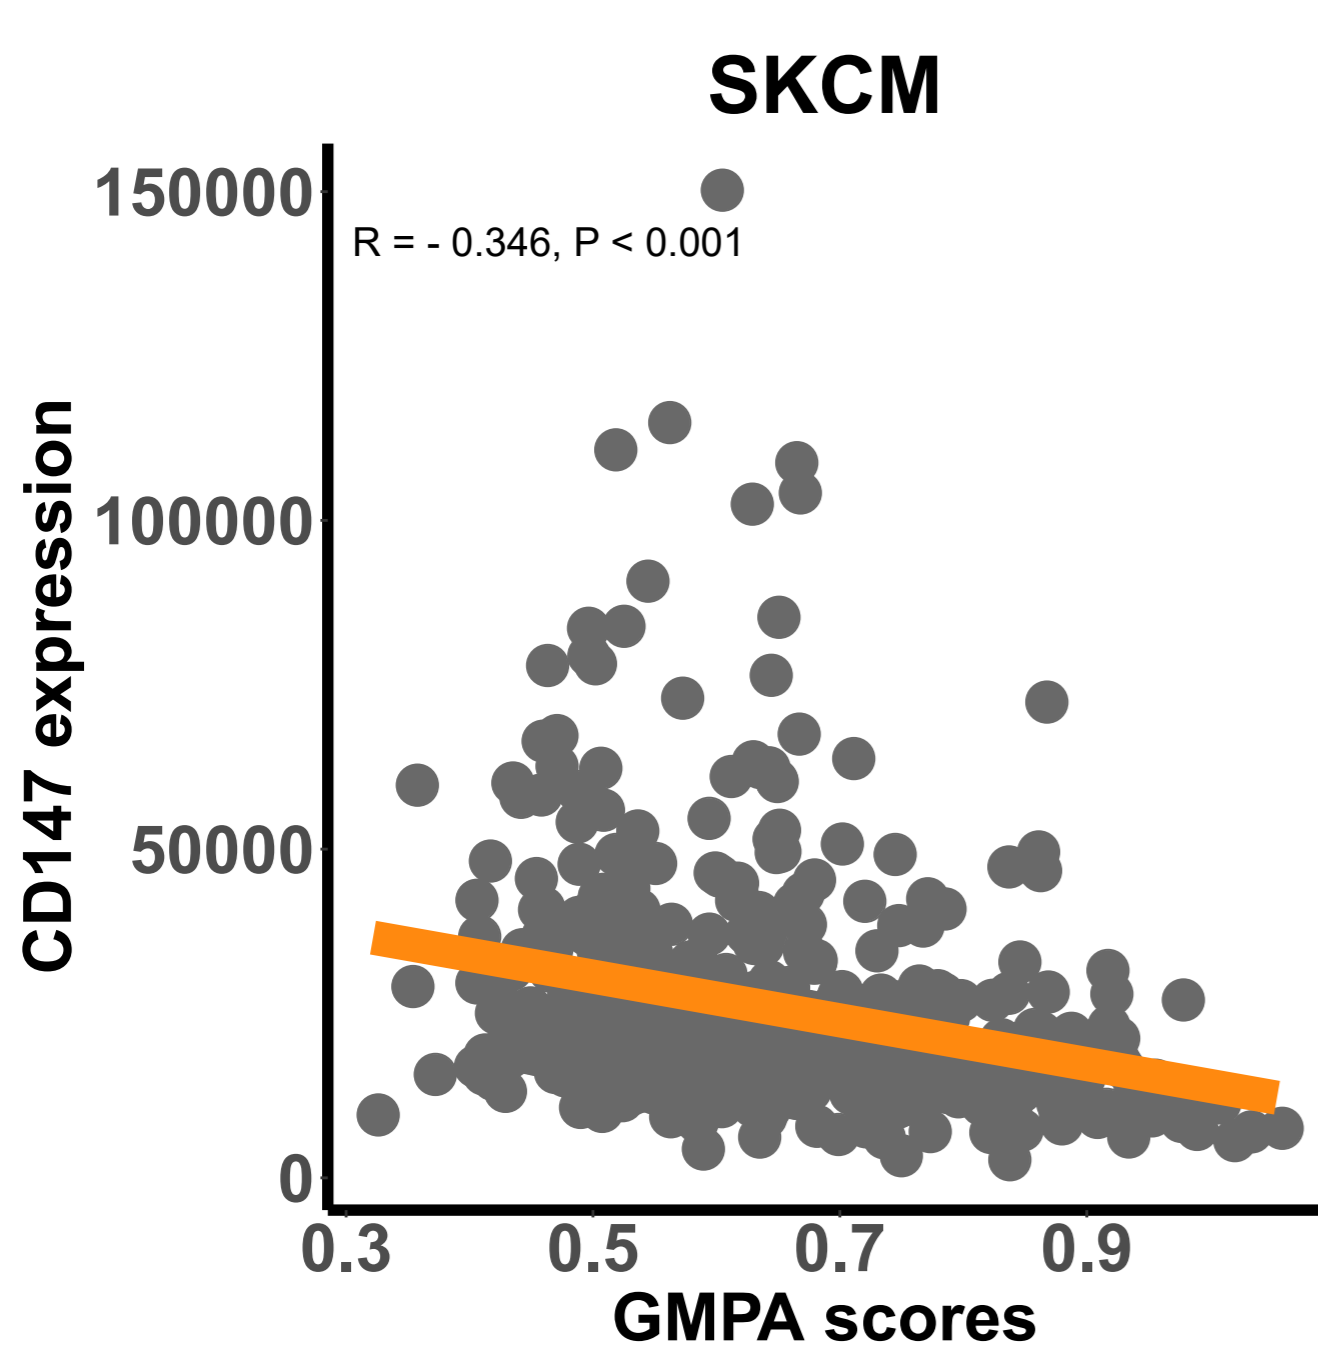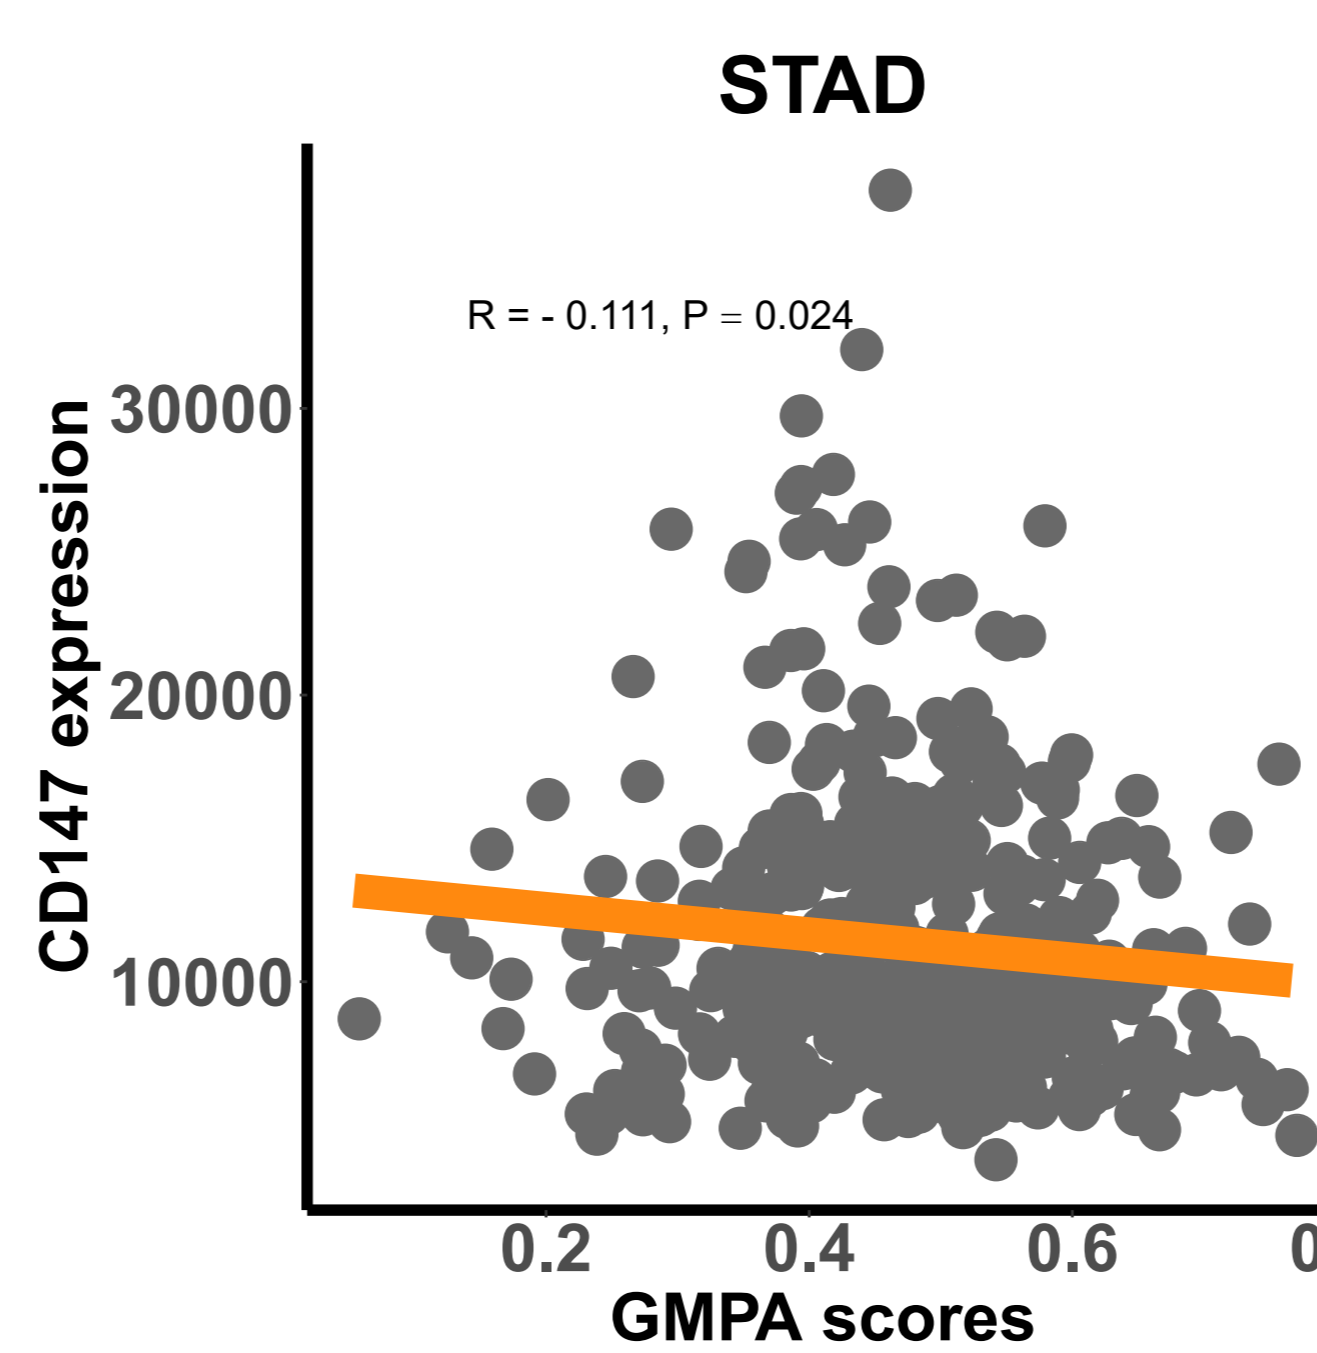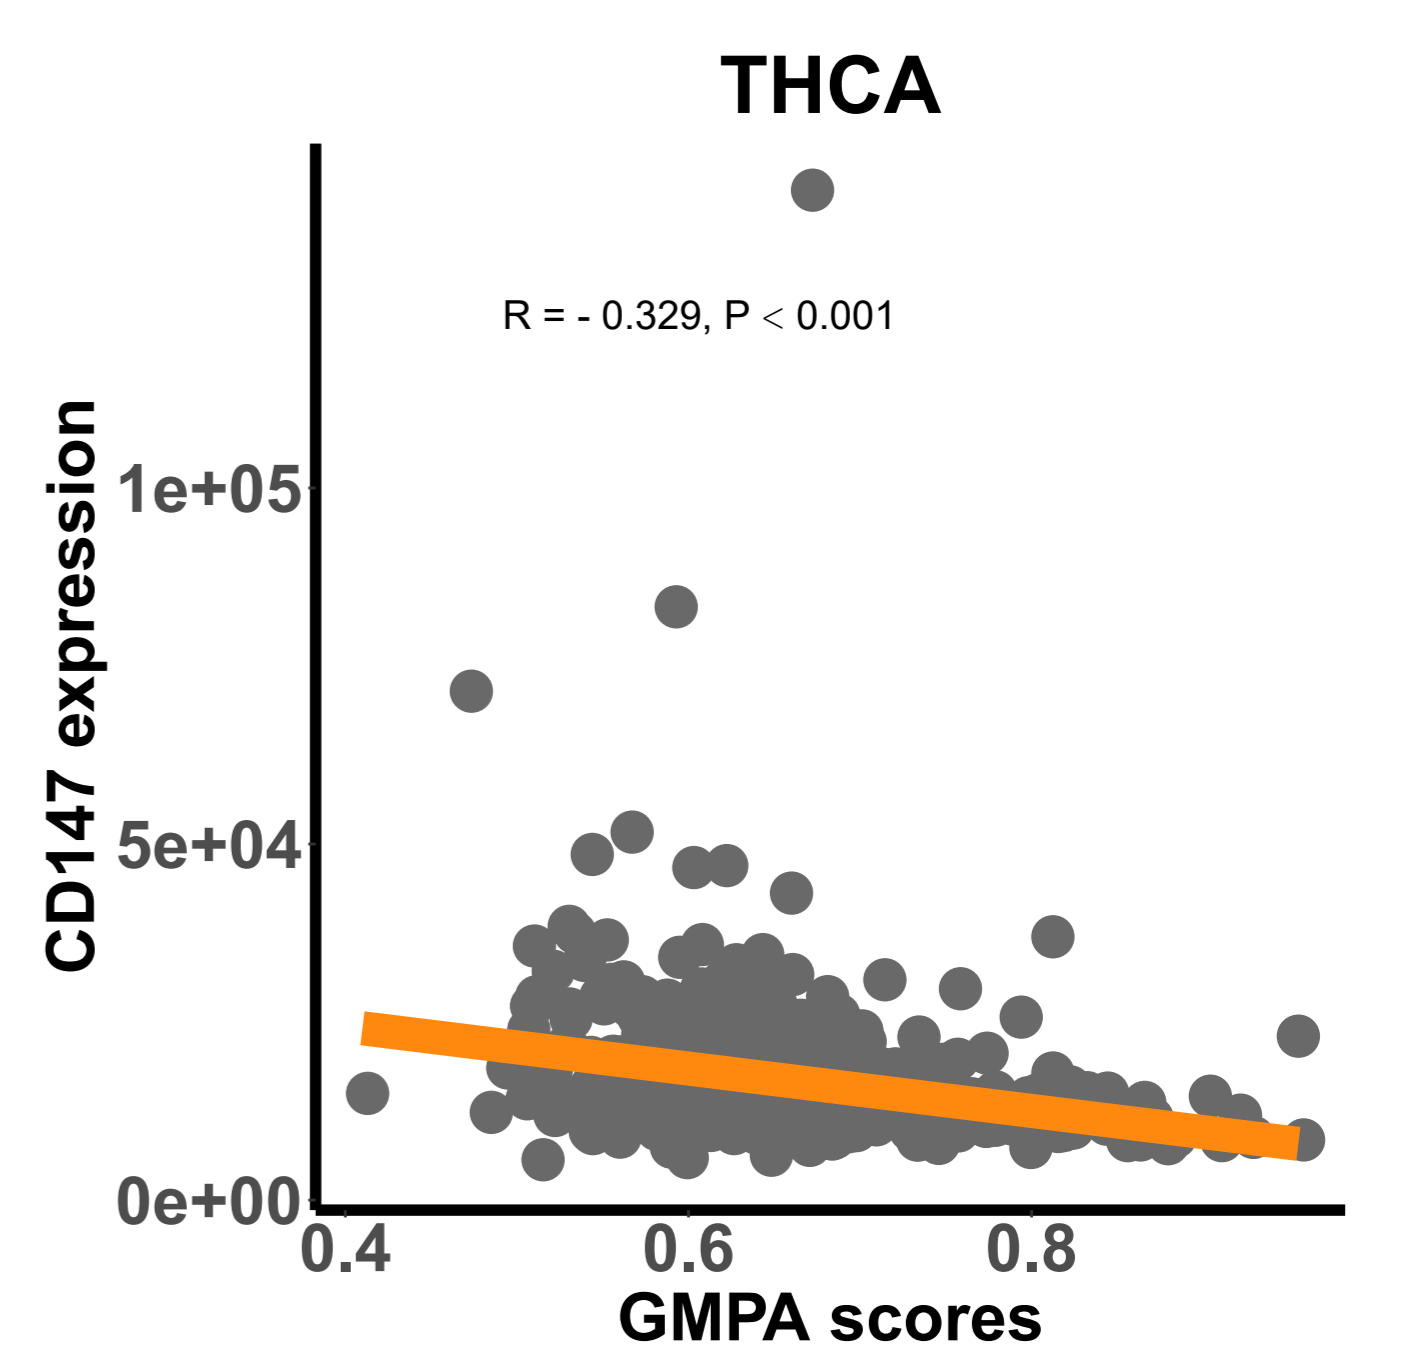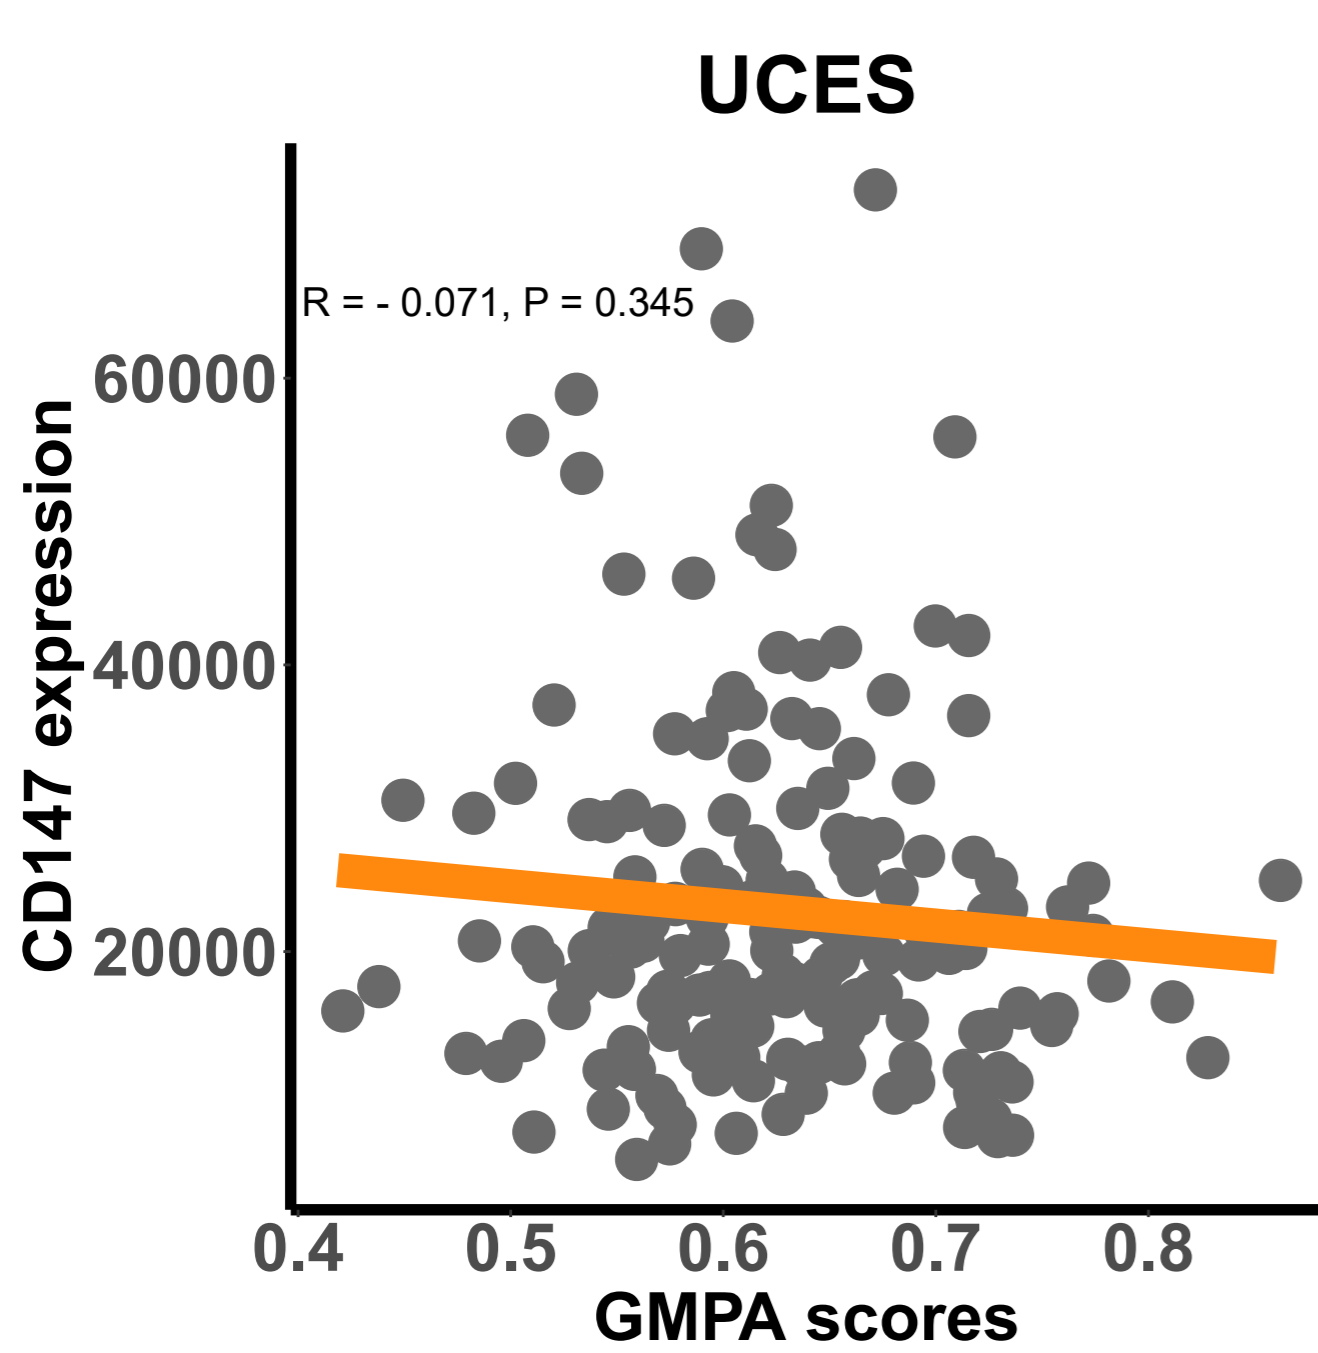

Supplement: mmc2.pdf [file mmc2.pdf]

**a**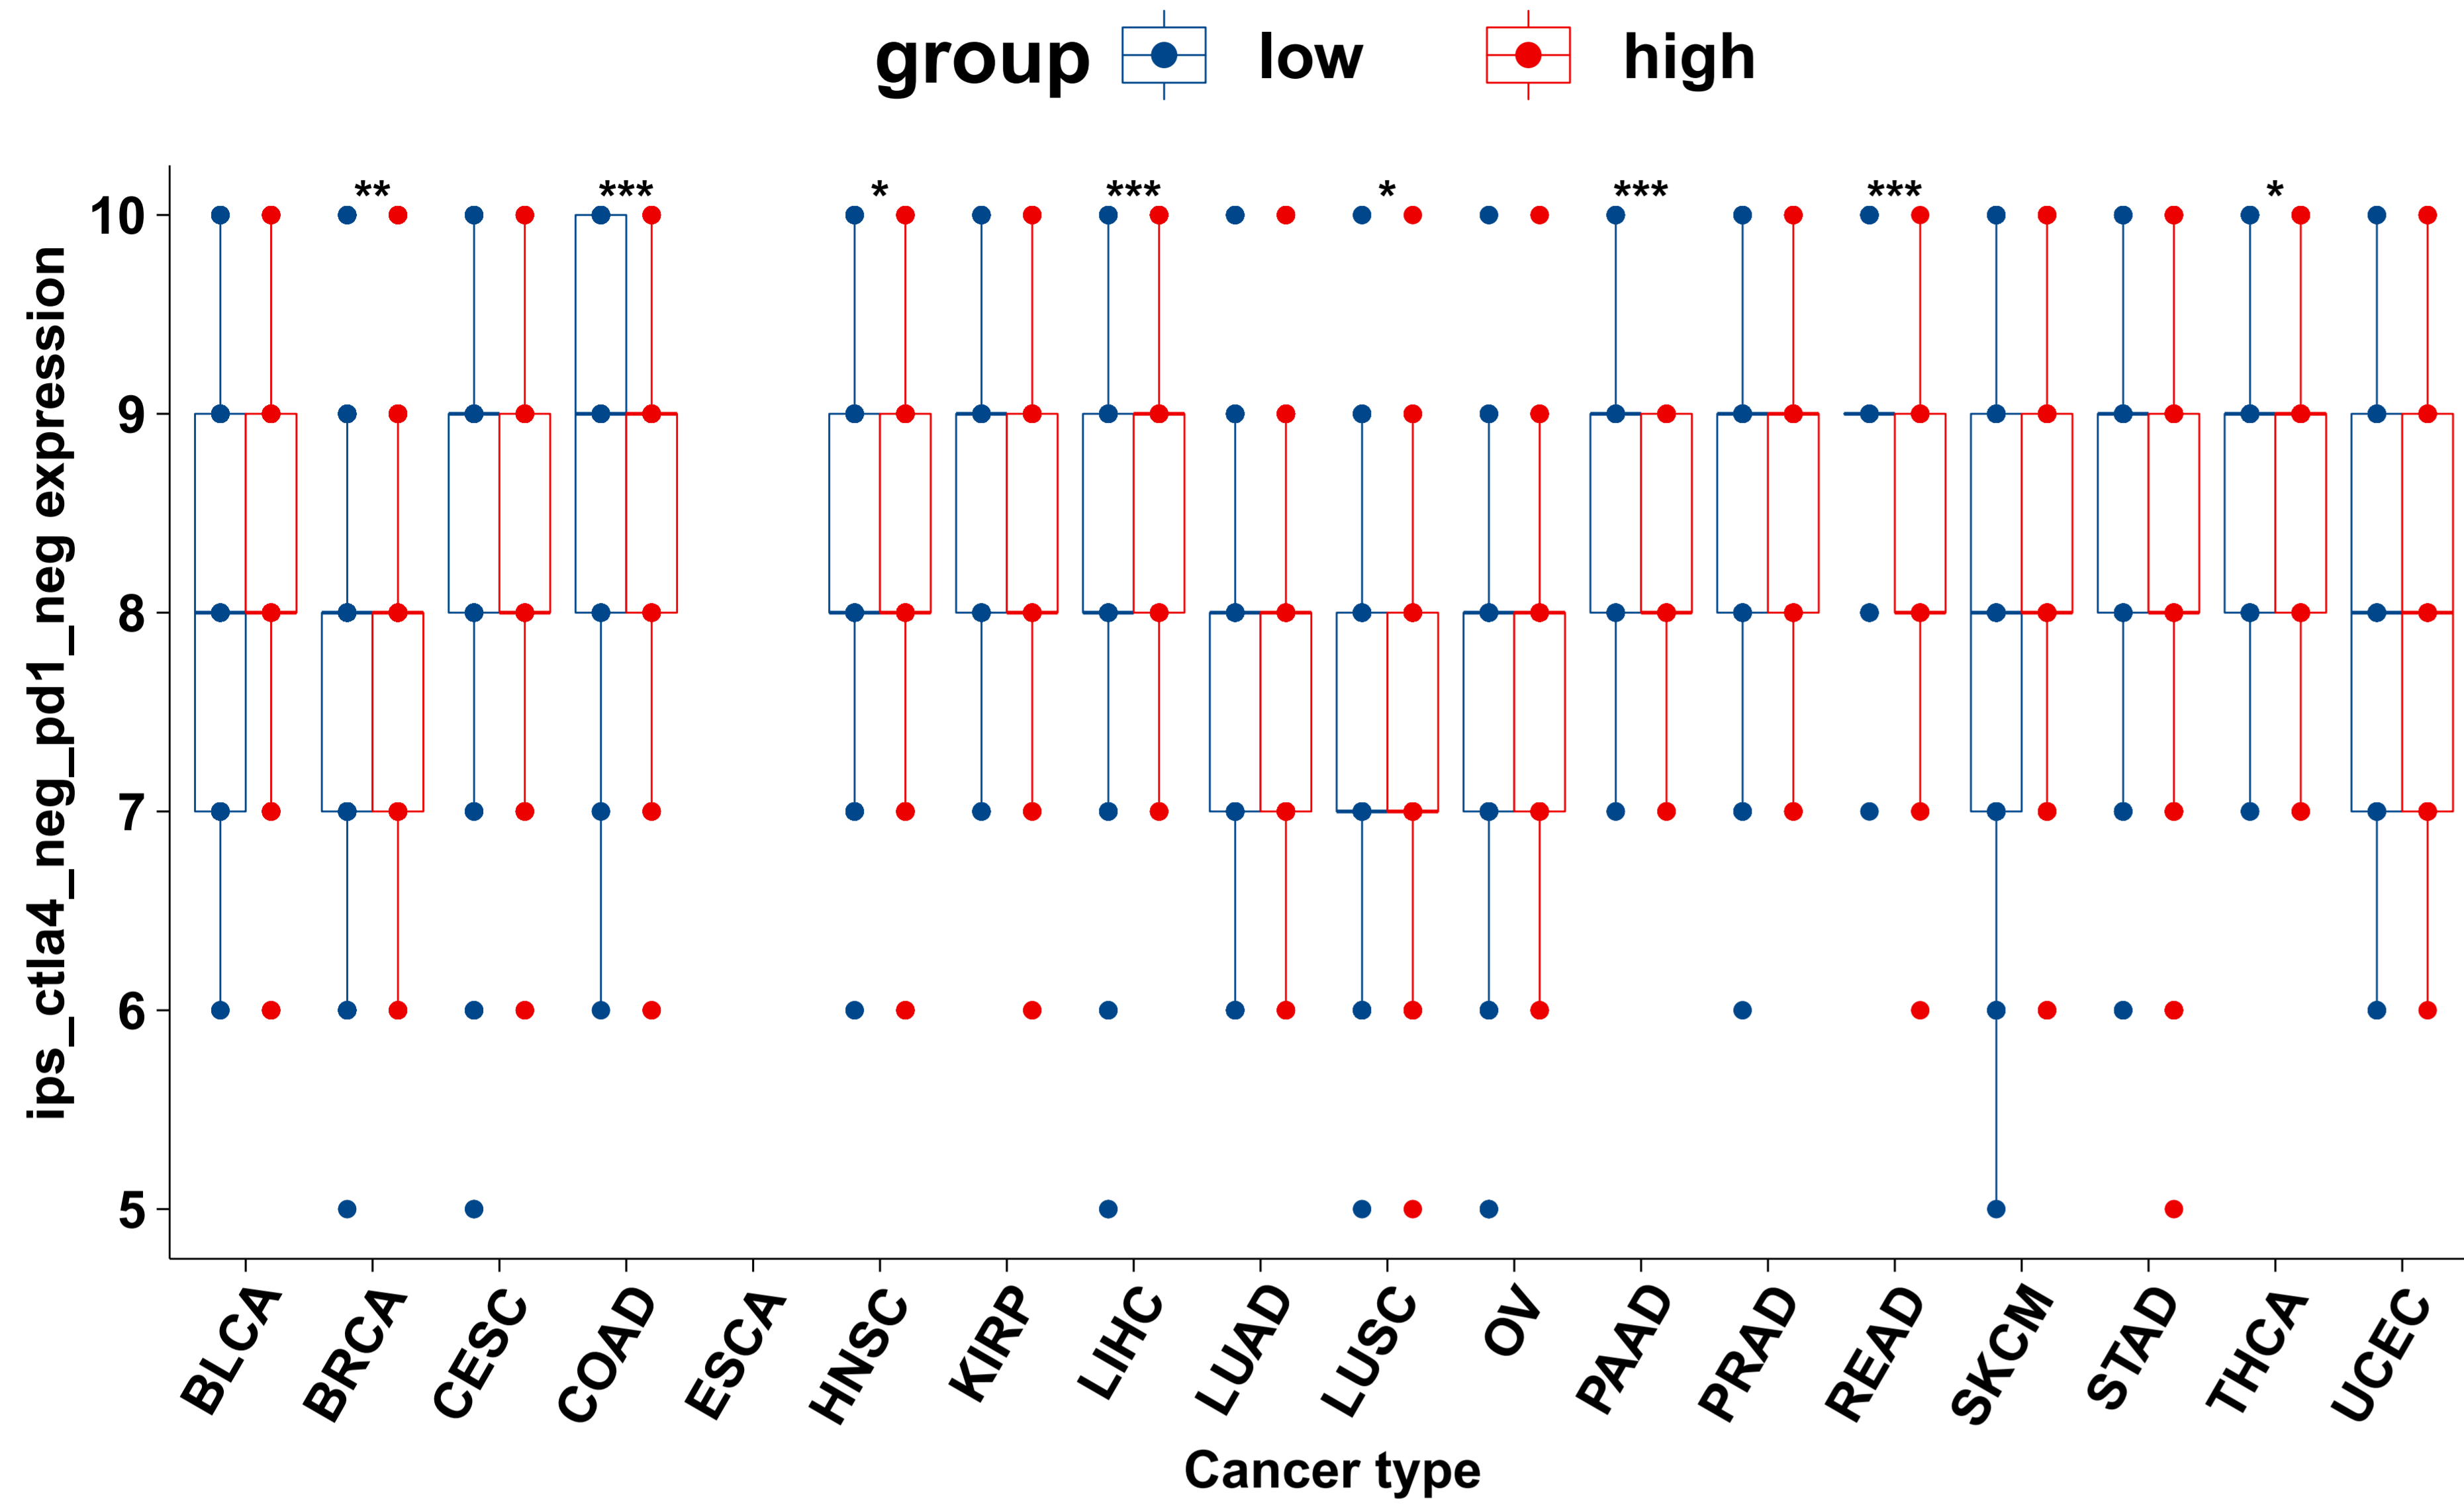**b**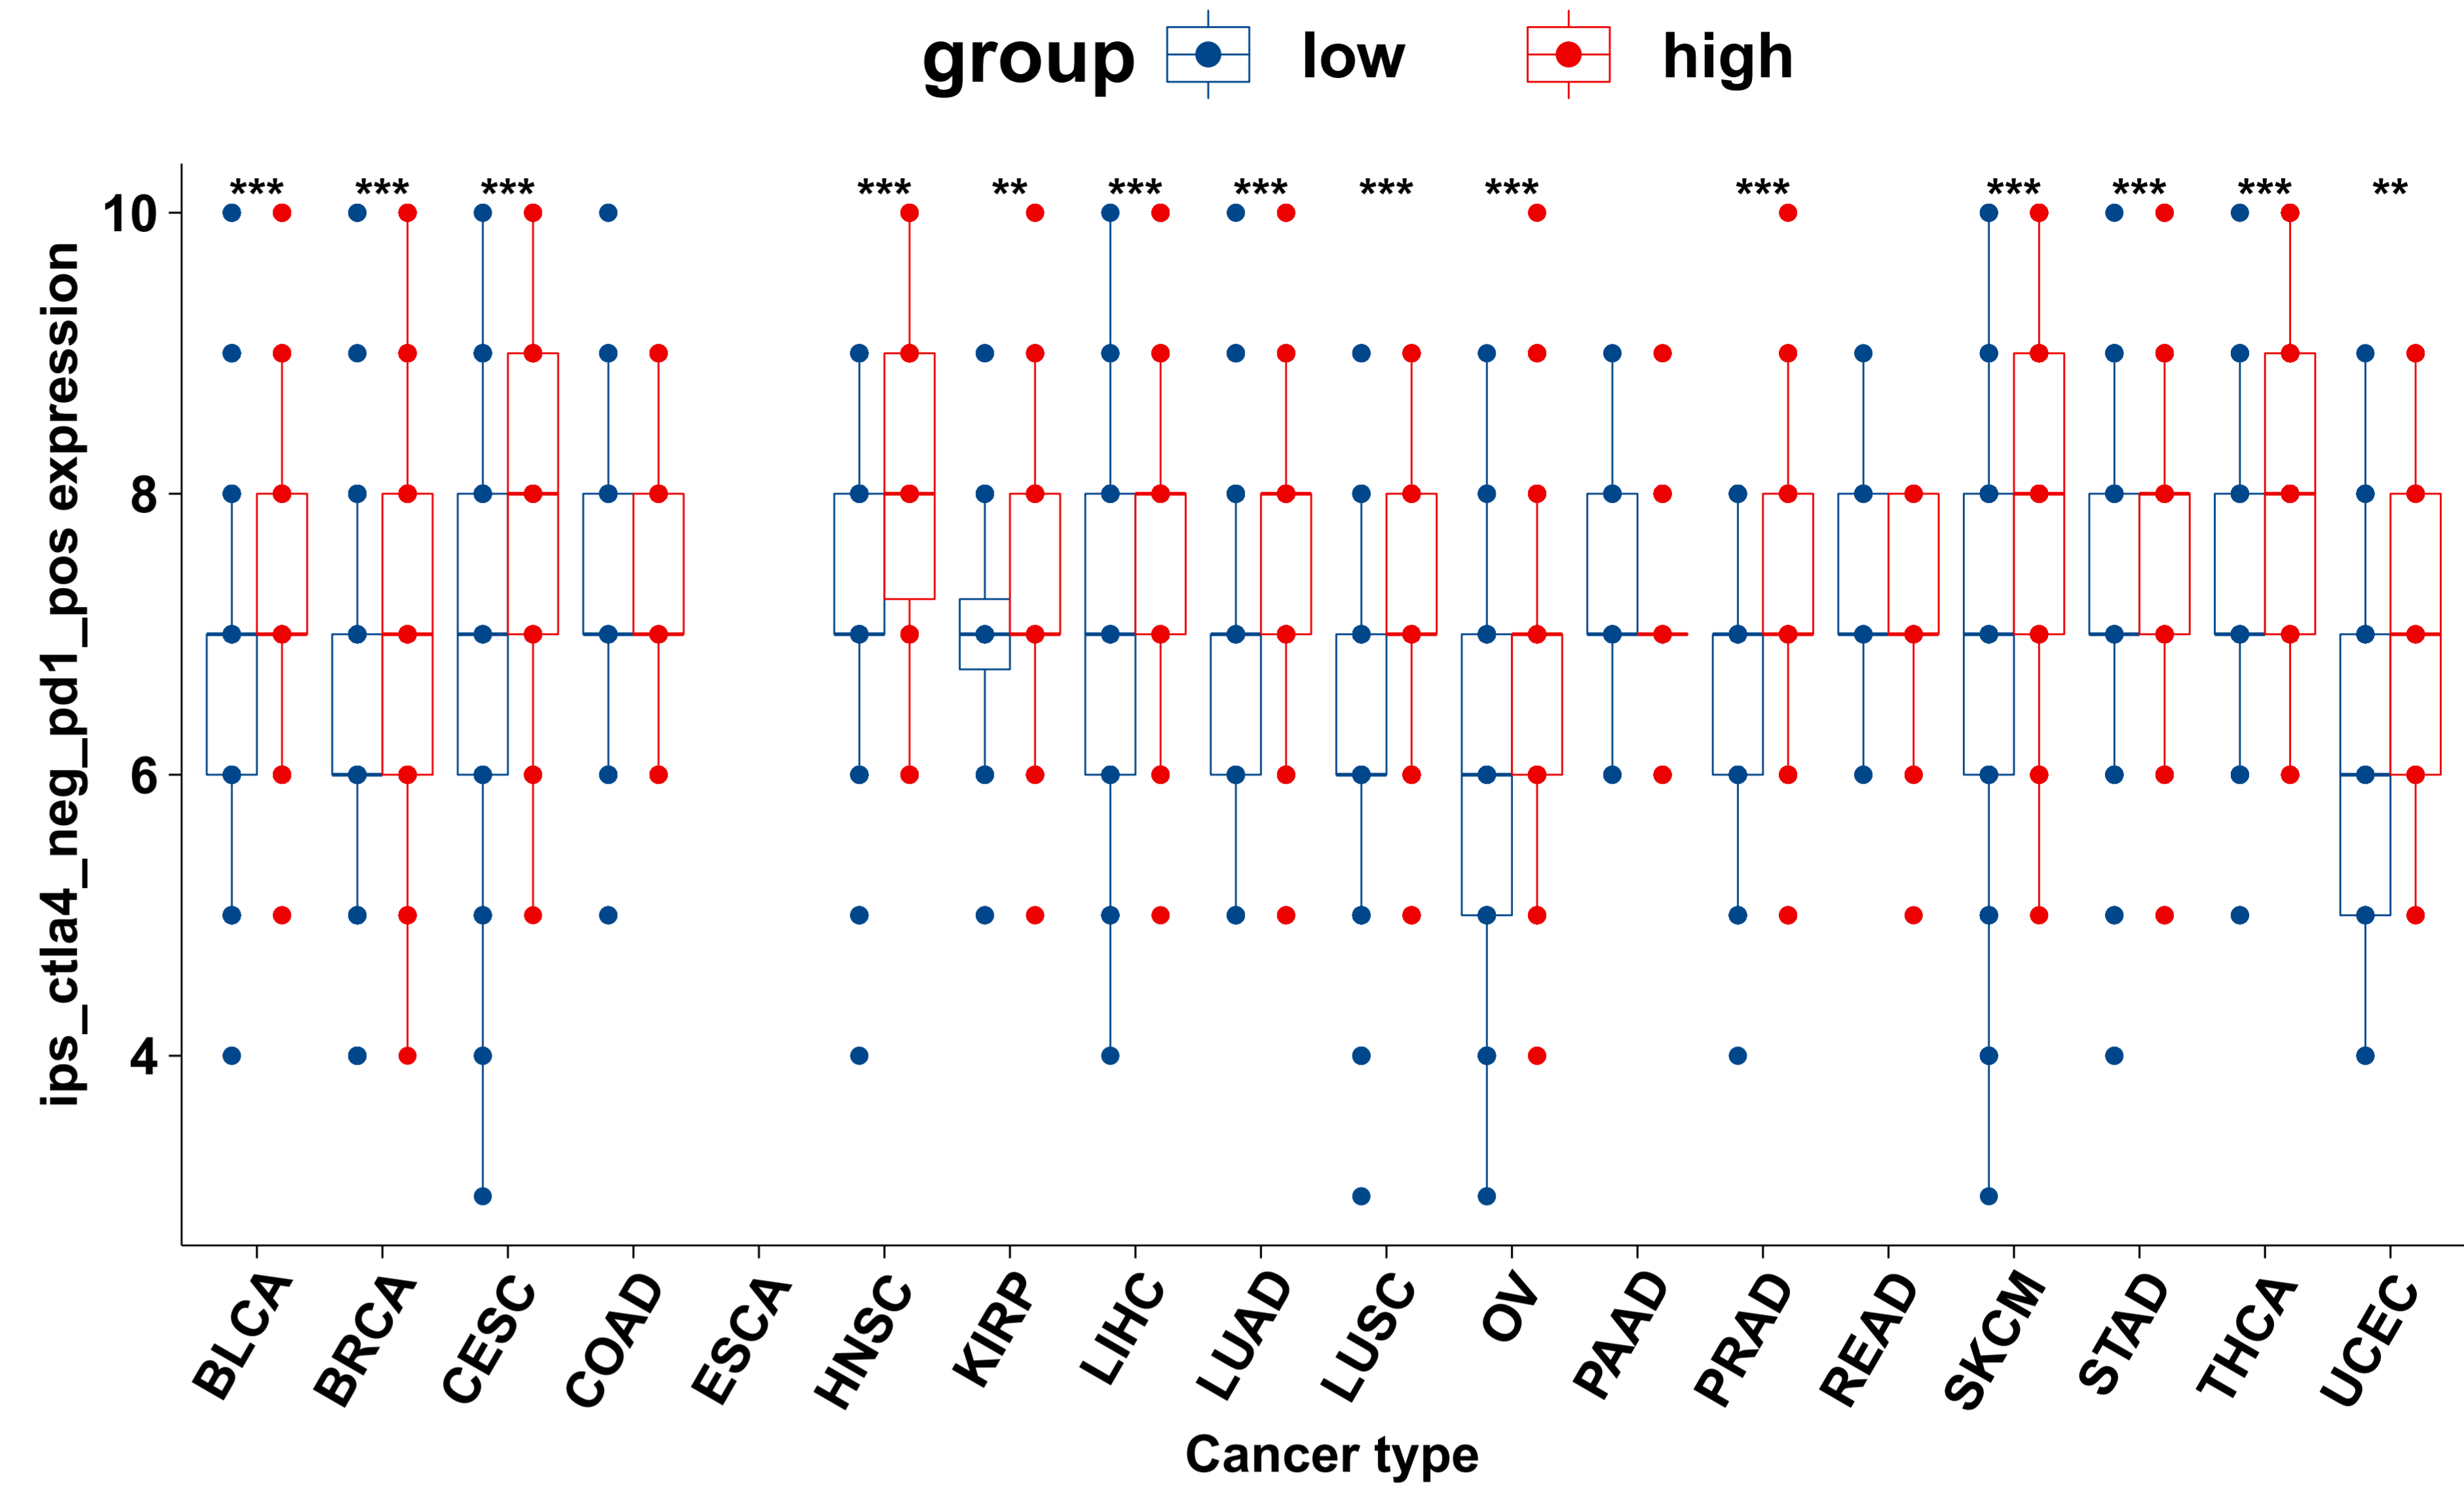**c**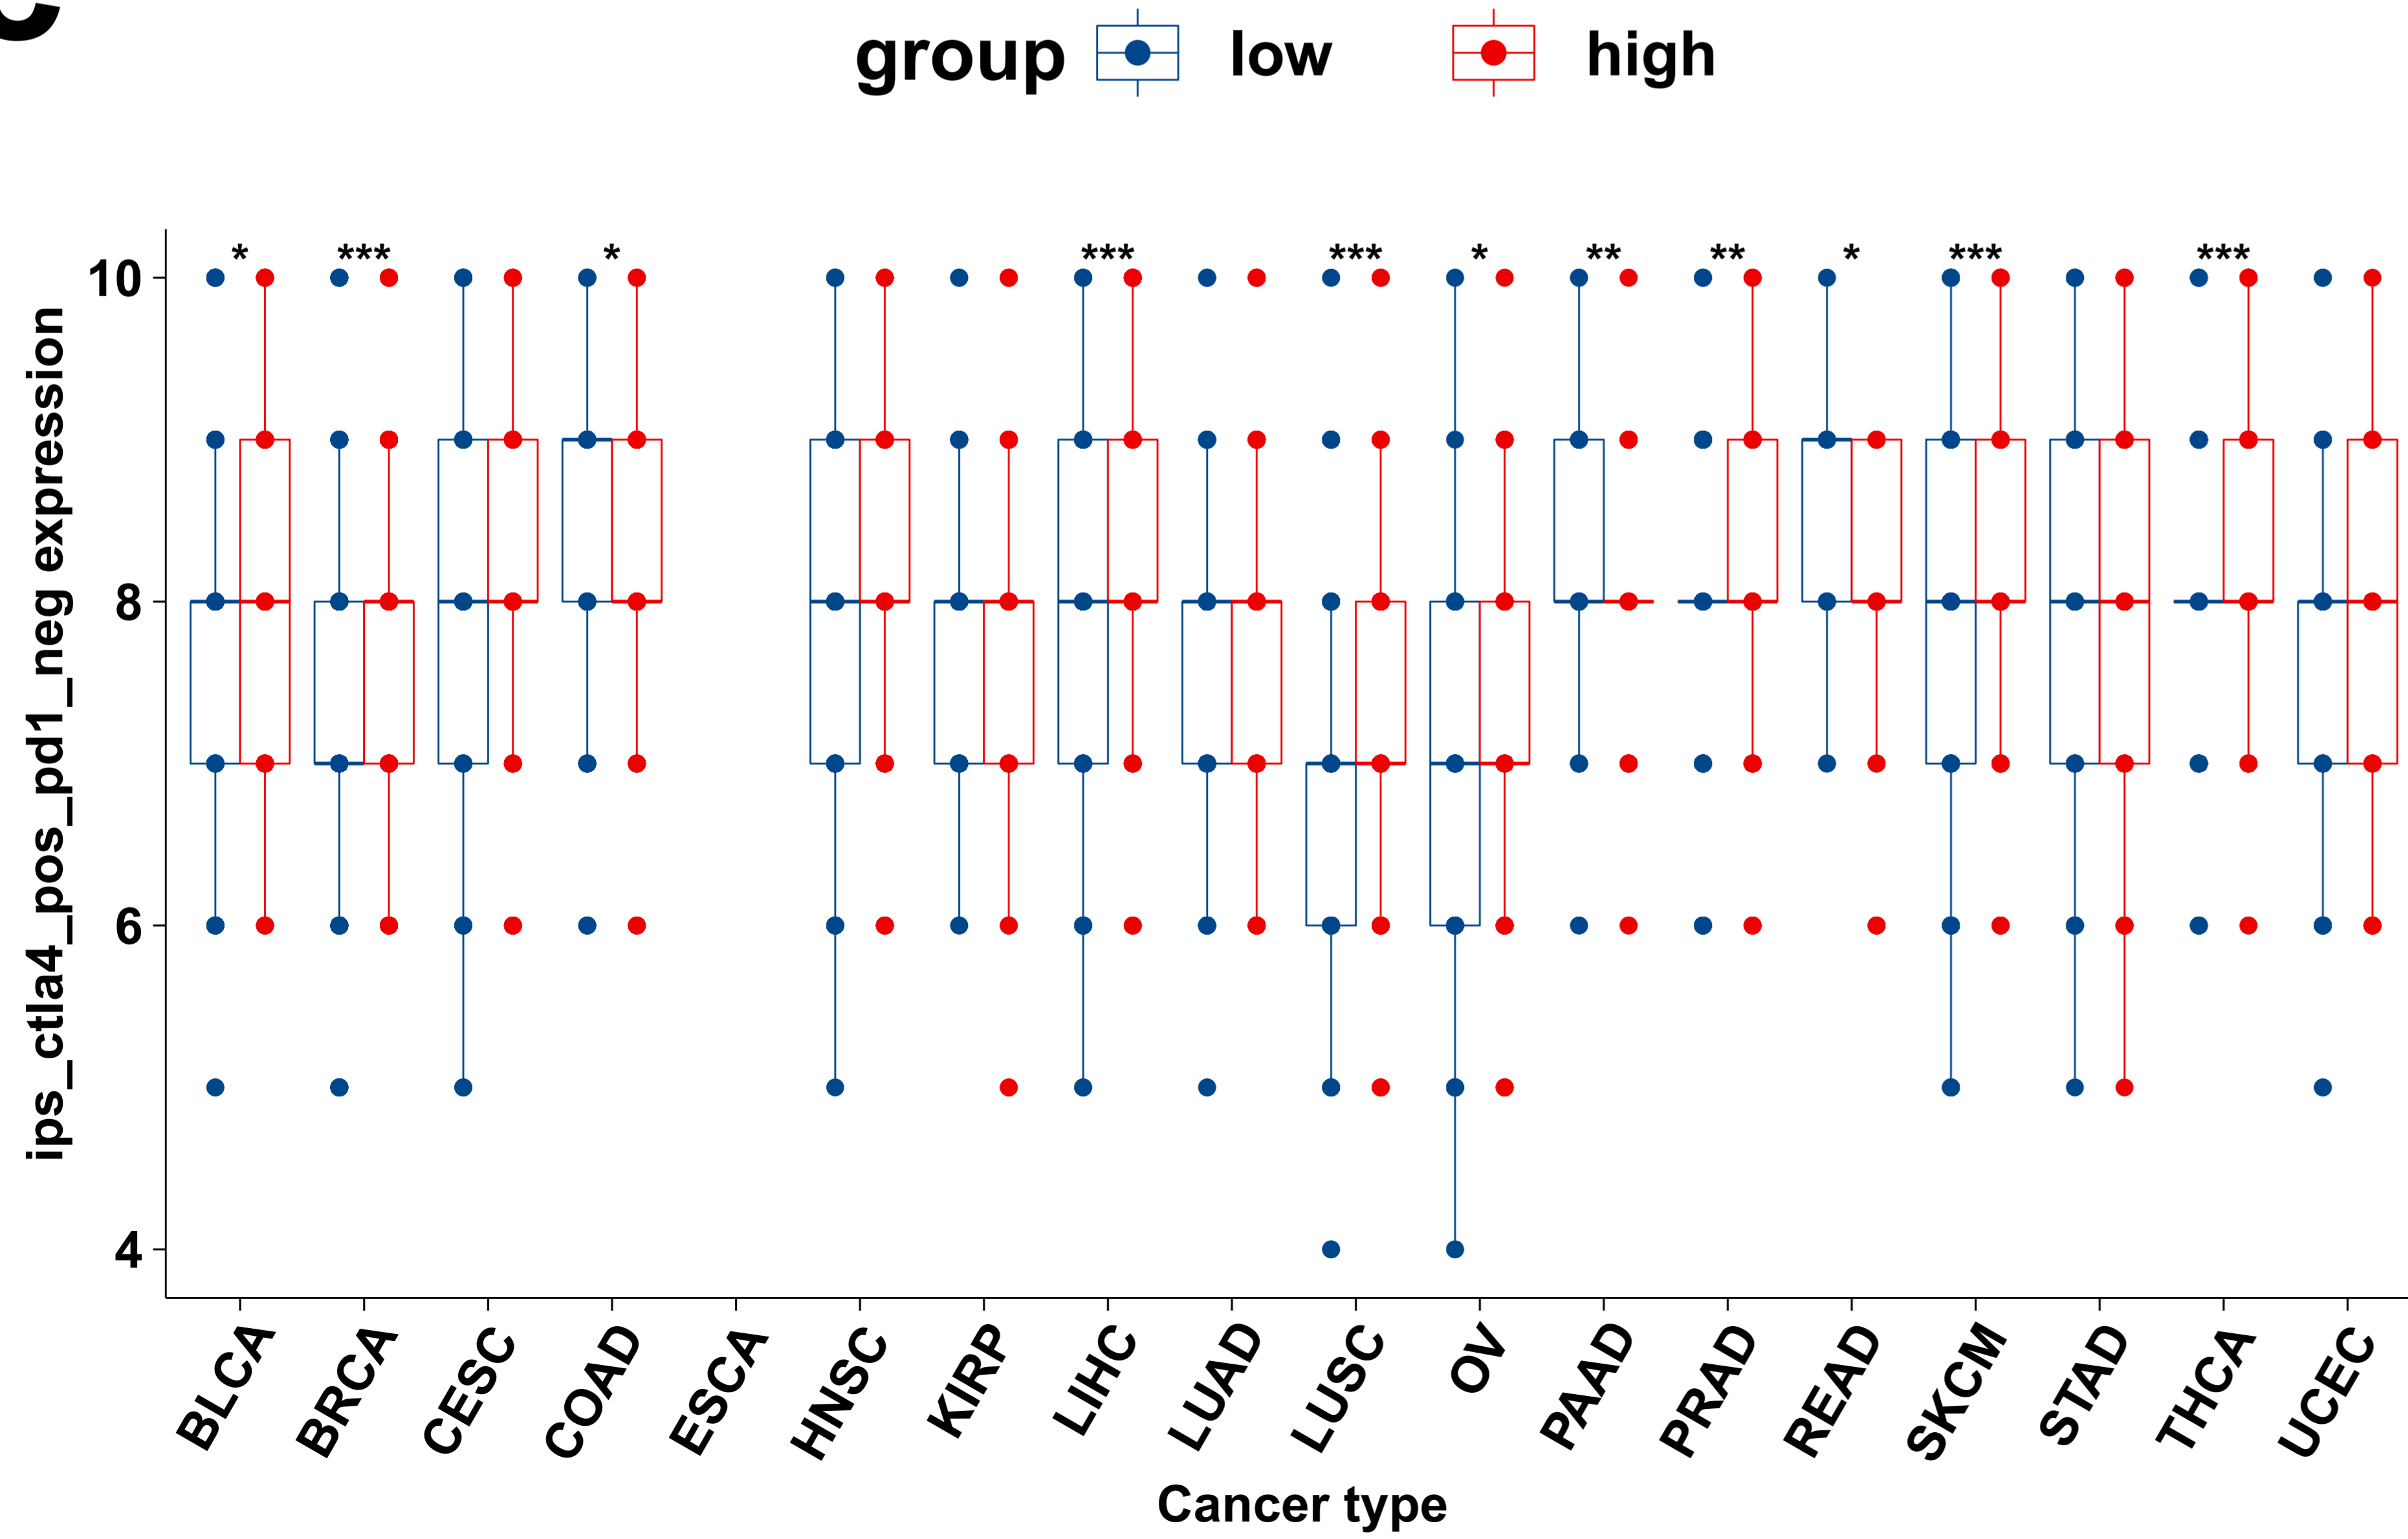**d**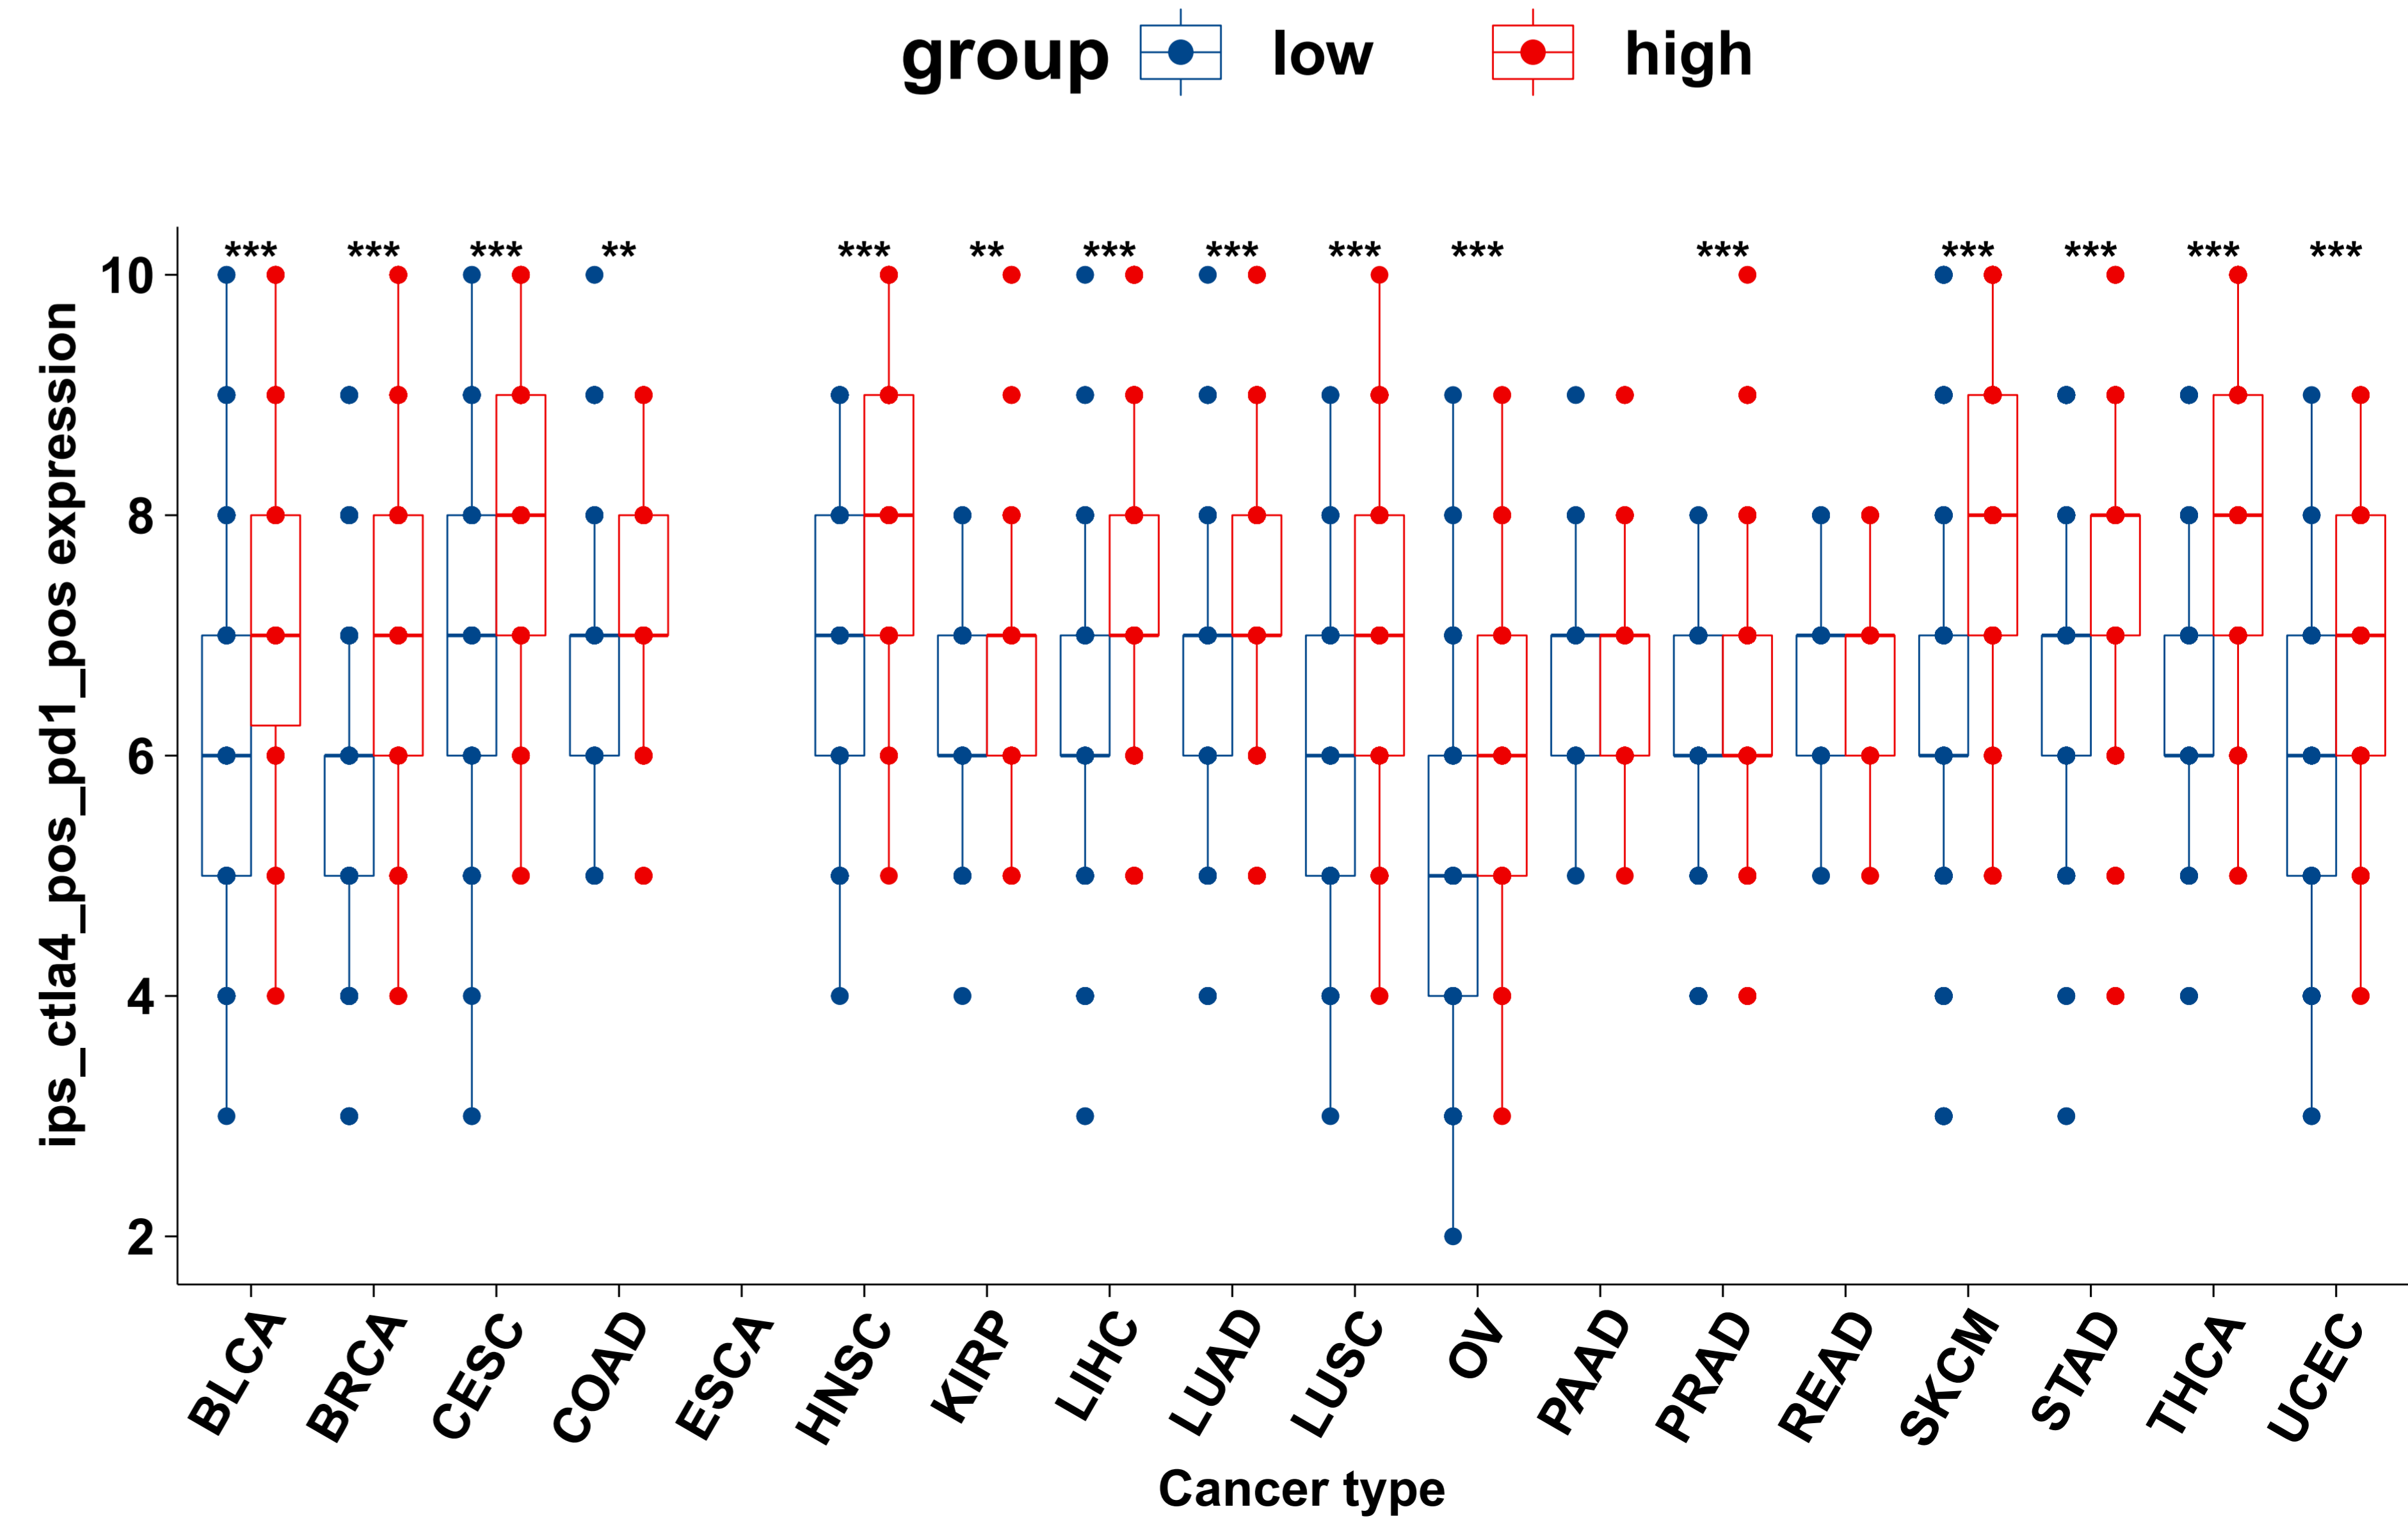

Supplement: mmc5.pdf [file mmc5.pdf]

**a****BRAF V600E****P = 0.029**

n=4

n=4

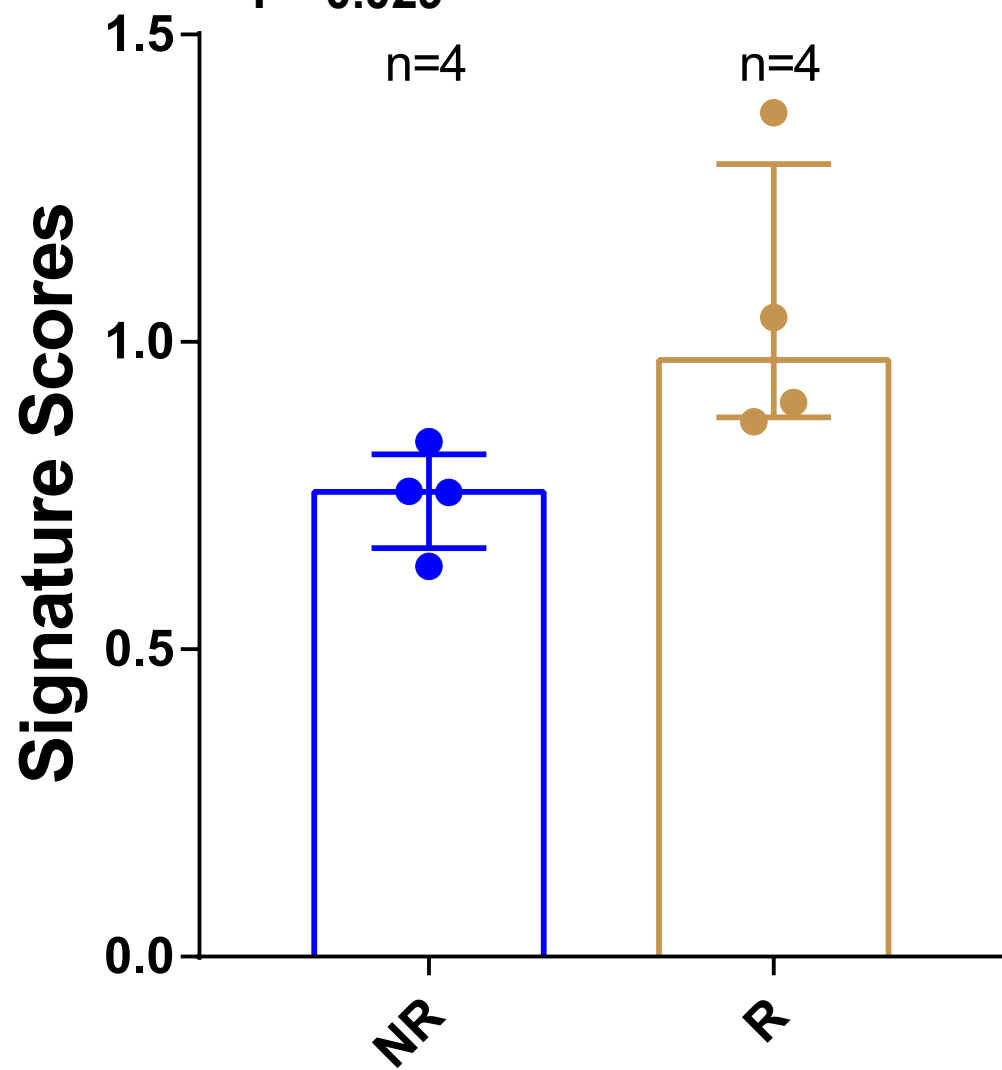**b****BRAF WT**

n=3

n=1

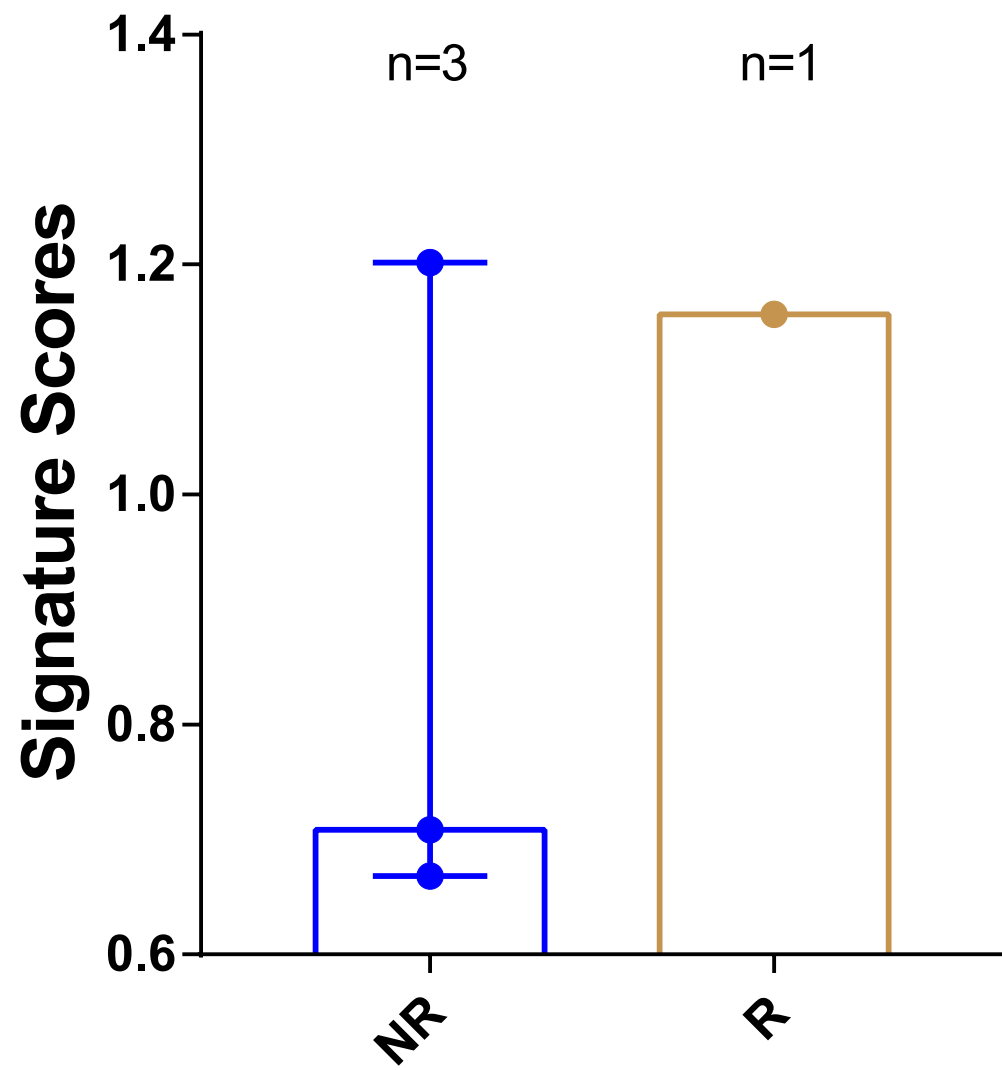**c****Abril-Rodriguez ROC AUC**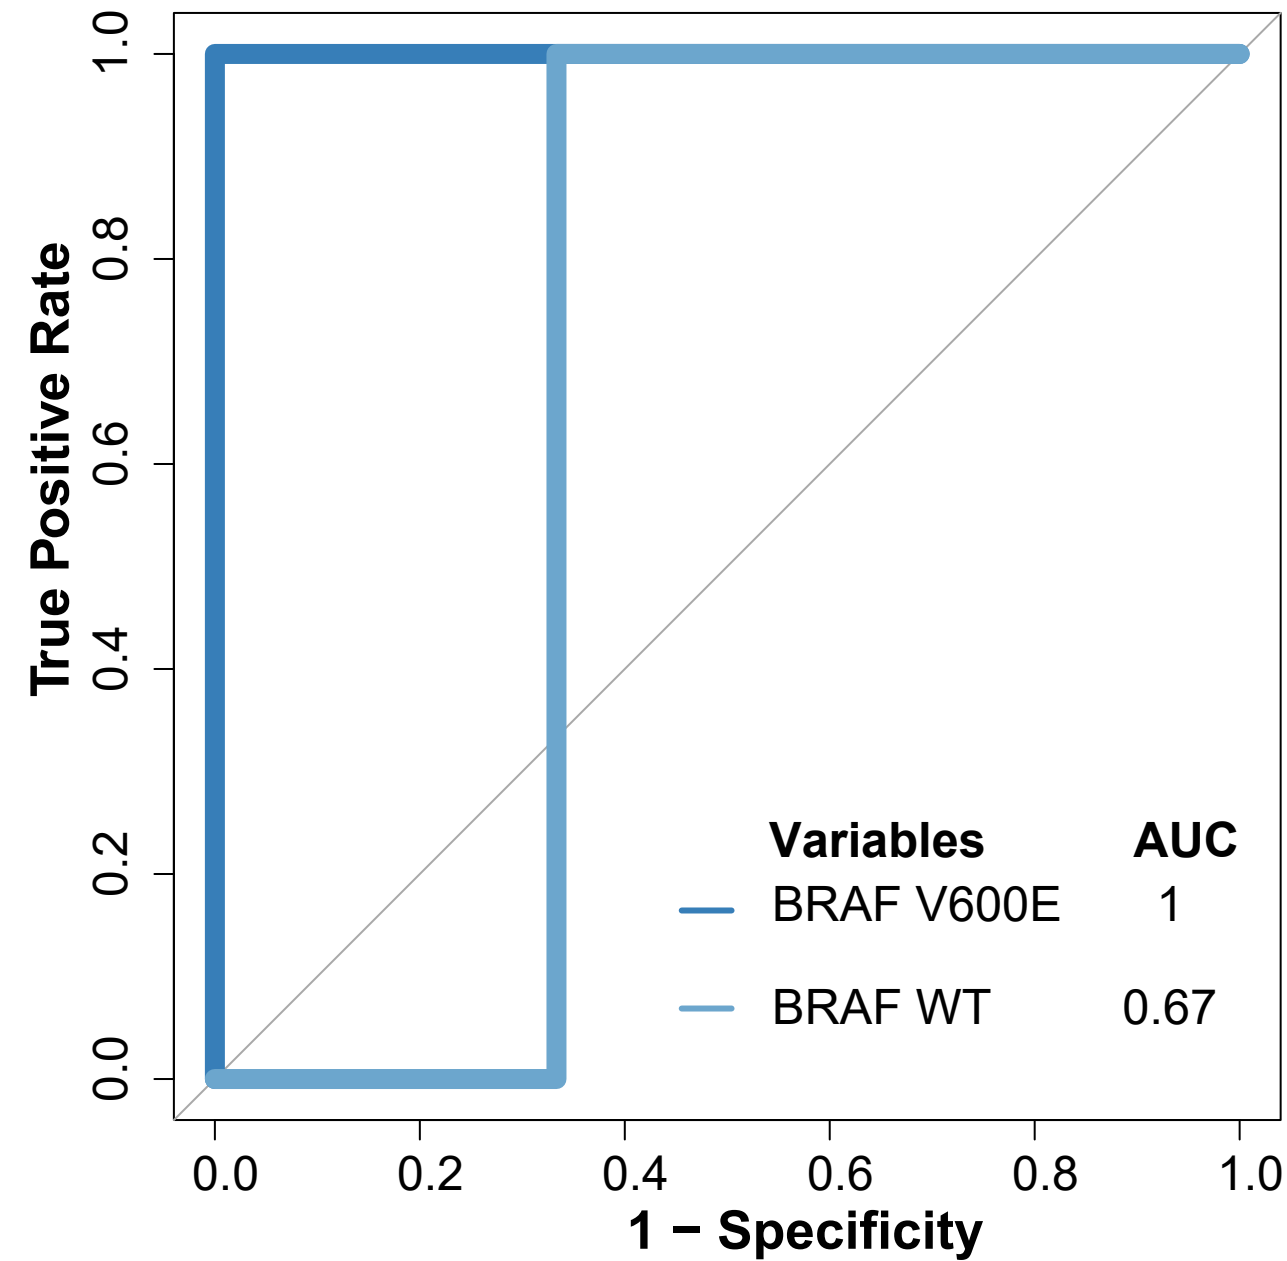

Supplement: mmc8.pdf [file mmc8.pdf]
